# Supplementary material for: Palladium-catalyzed direct and regioselective C–H acyloxylation of indolizines
Source: Royal Society of Chemistry journal article supplement (doi:10.1039/c5ob01359c), 2015-01-01
Supplement: c5ob01359c1.pdf [file c5ob01359c1.pdf]

# Palladium-catalyzed Direct and Regioselective C-H Acyloxylation of Indolizines

Jinwei Sun,<sup>a</sup> Fuyao Wang,<sup>a</sup> Yongmiao Shen,<sup>b</sup> Huizhen Zhi,<sup>c</sup> Hui Wu<sup>a,\*</sup> Yun Liu<sup>a,\*</sup>

<sup>a</sup> Jiangsu Key Laboratory of Green Synthetic Chemistry for Functional Materials and Institute of Chemistry and Chemical Engineering, Jiangsu Normal University, Xuzhou 221116, Jiangsu, P. R. China

<sup>b</sup> School of Chemistry and Chemical Engineering, Shaoxing University, Shaoxing, Zhejiang, P. R. China

<sup>c</sup> School of Chemistry and Chemical Engineering, Nanjing Normal University, Nanjing, 210023, Zhejiang, P. R. China

*E-mail:* [wuhui72@126.com](mailto:wuhui72@126.com); [xznuliuyun@jsnu.edu.cn](mailto:xznuliuyun@jsnu.edu.cn)

## Table of Content

|                                                                                     |     |
|-------------------------------------------------------------------------------------|-----|
| 1. Copies of <sup>1</sup> H NMR and <sup>13</sup> C NMR of Compounds <b>2</b>       | S2  |
| 2. Copies of <sup>1</sup> H NMR and <sup>13</sup> C NMR of Compounds <b>3</b>       | S22 |
| 3. Copies of <sup>1</sup> H NMR and <sup>13</sup> C NMR of Compounds <b>4, 5, 6</b> | S30 |
| 4. DFT calculation of 3-acylindolizine and 2-esterindolizine                        | S35 |
| 5. ORTEP drawing of <b>2t</b>                                                       | S36 |

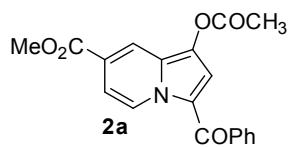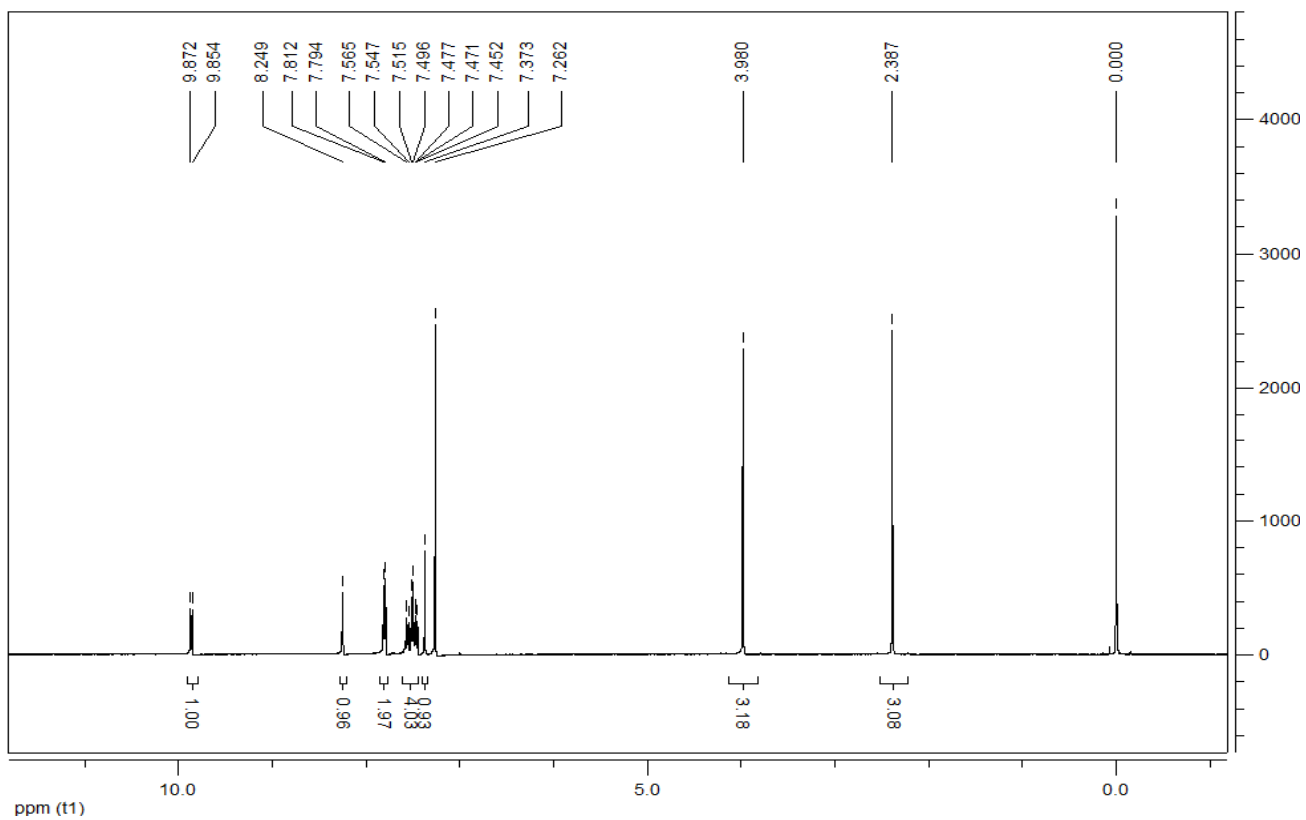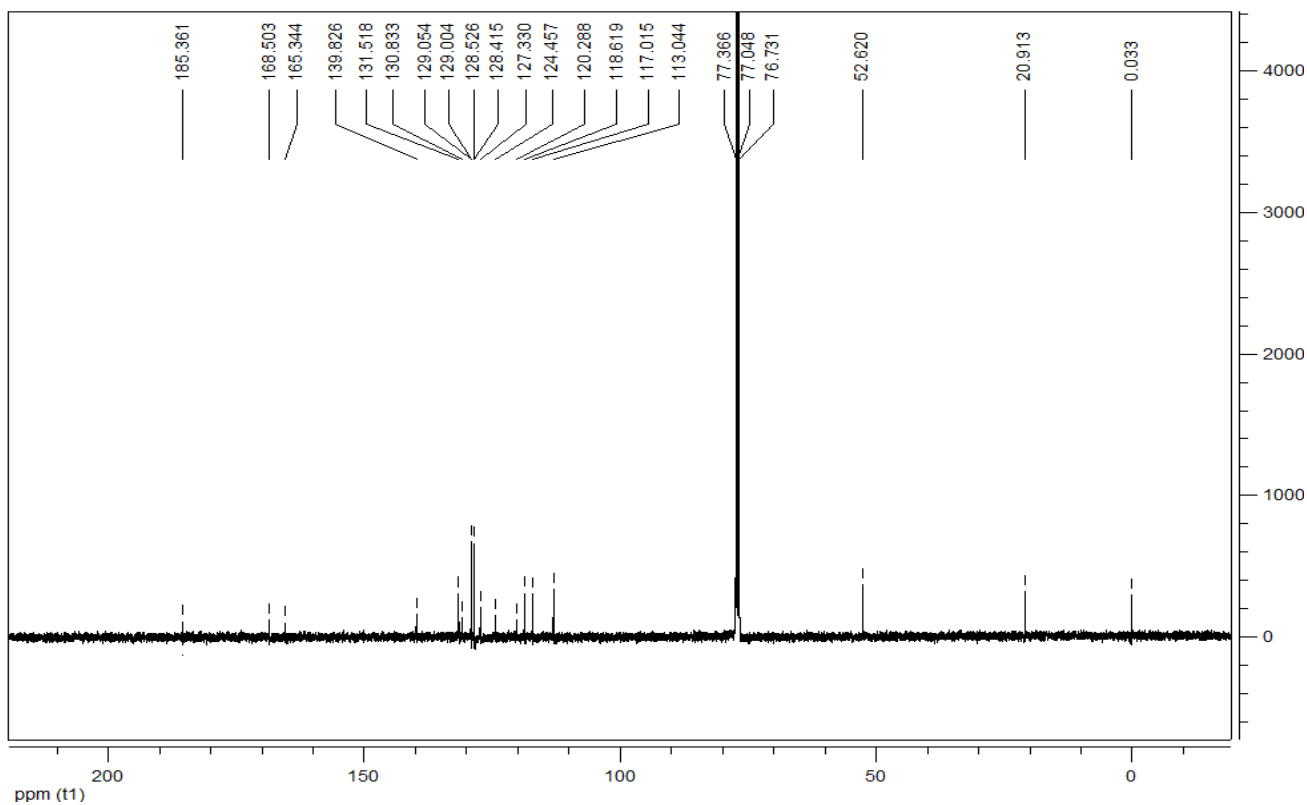

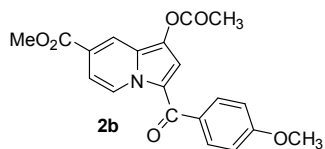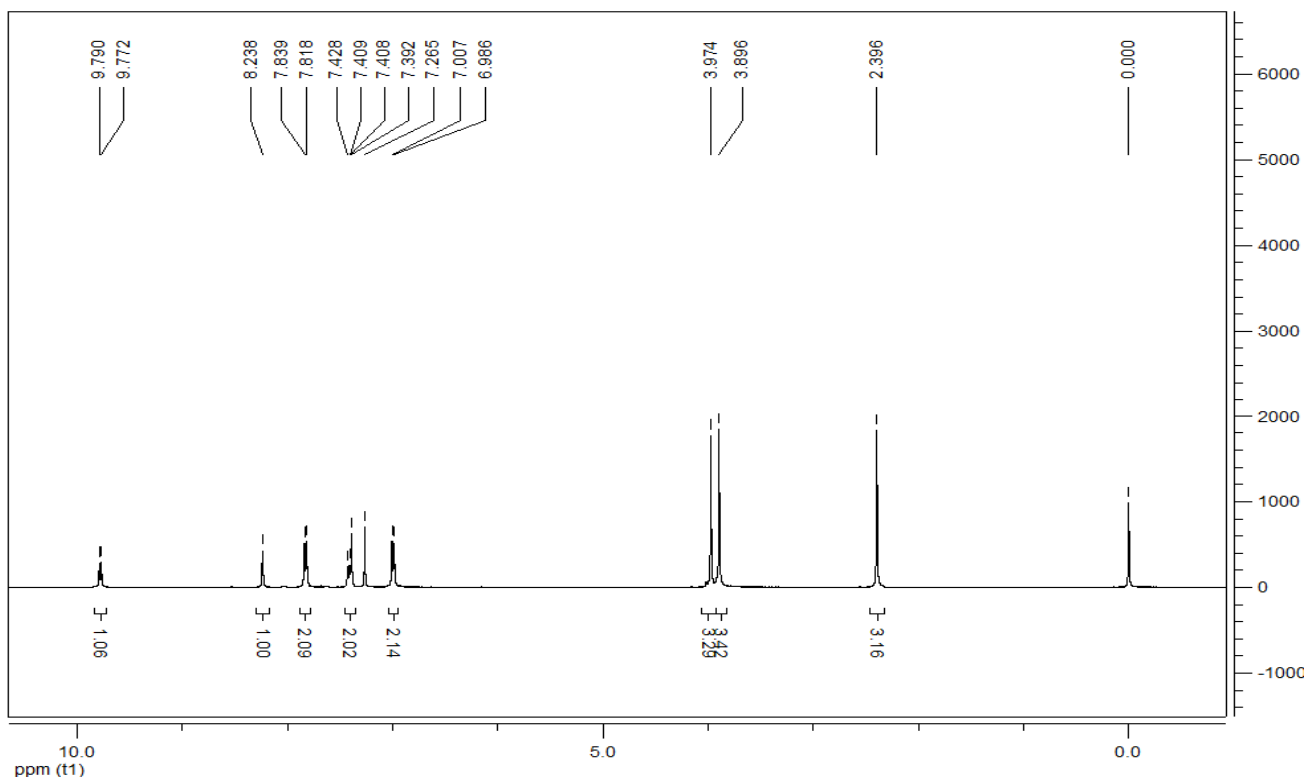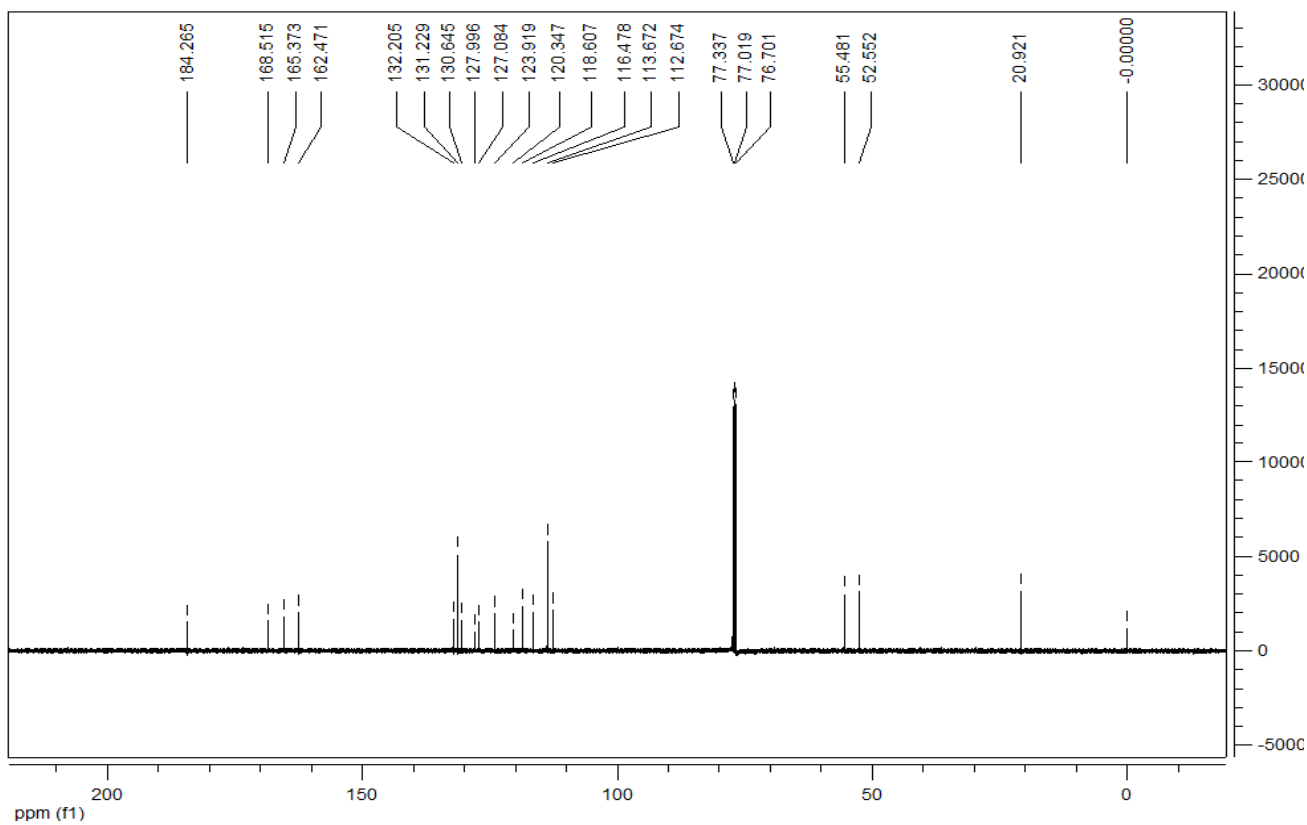

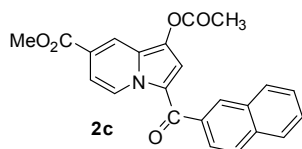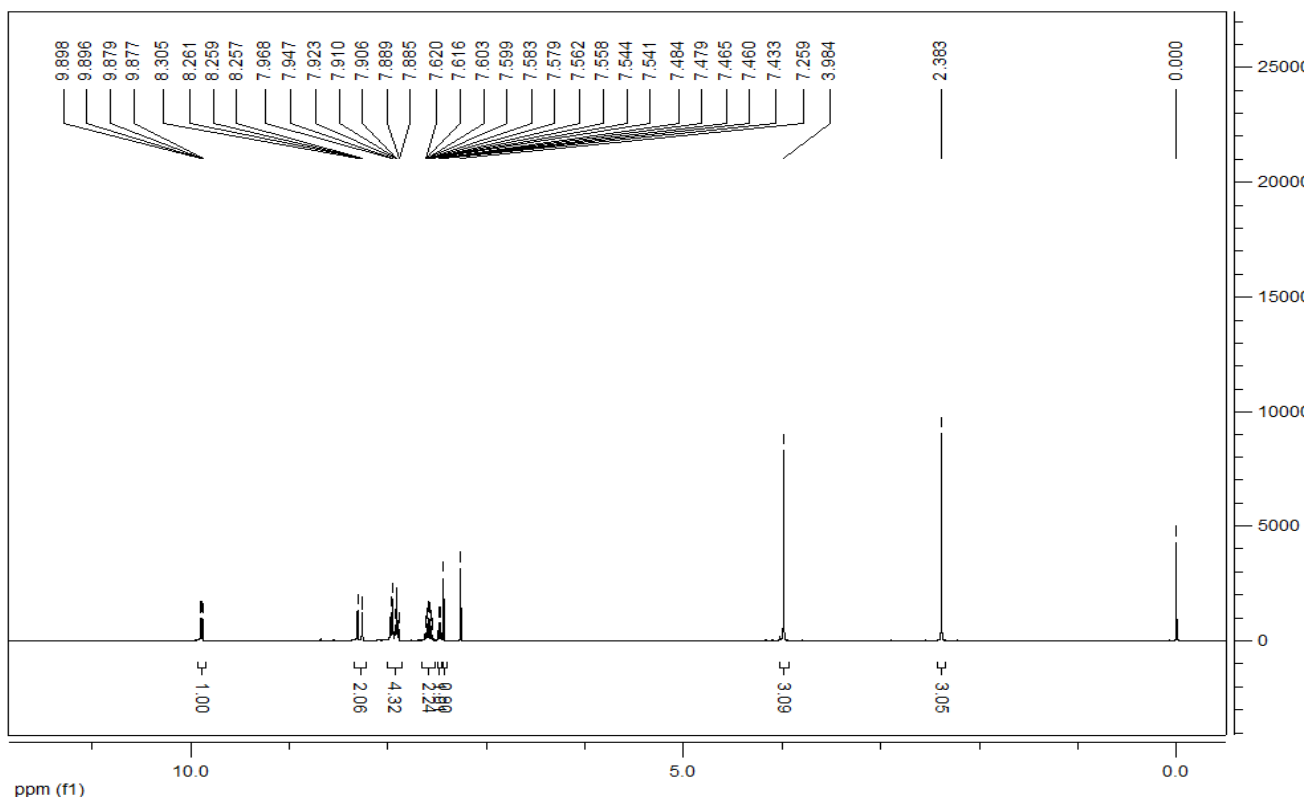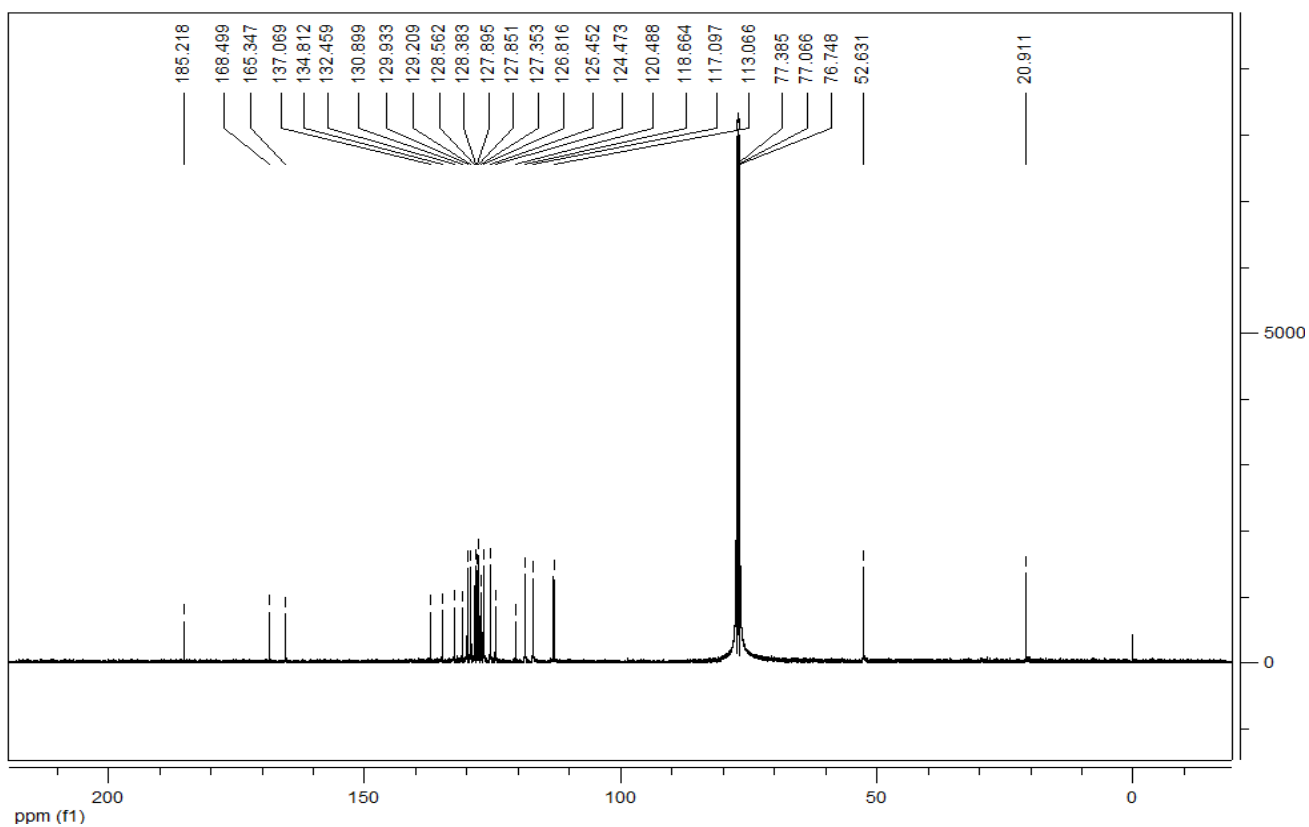

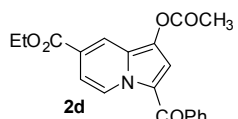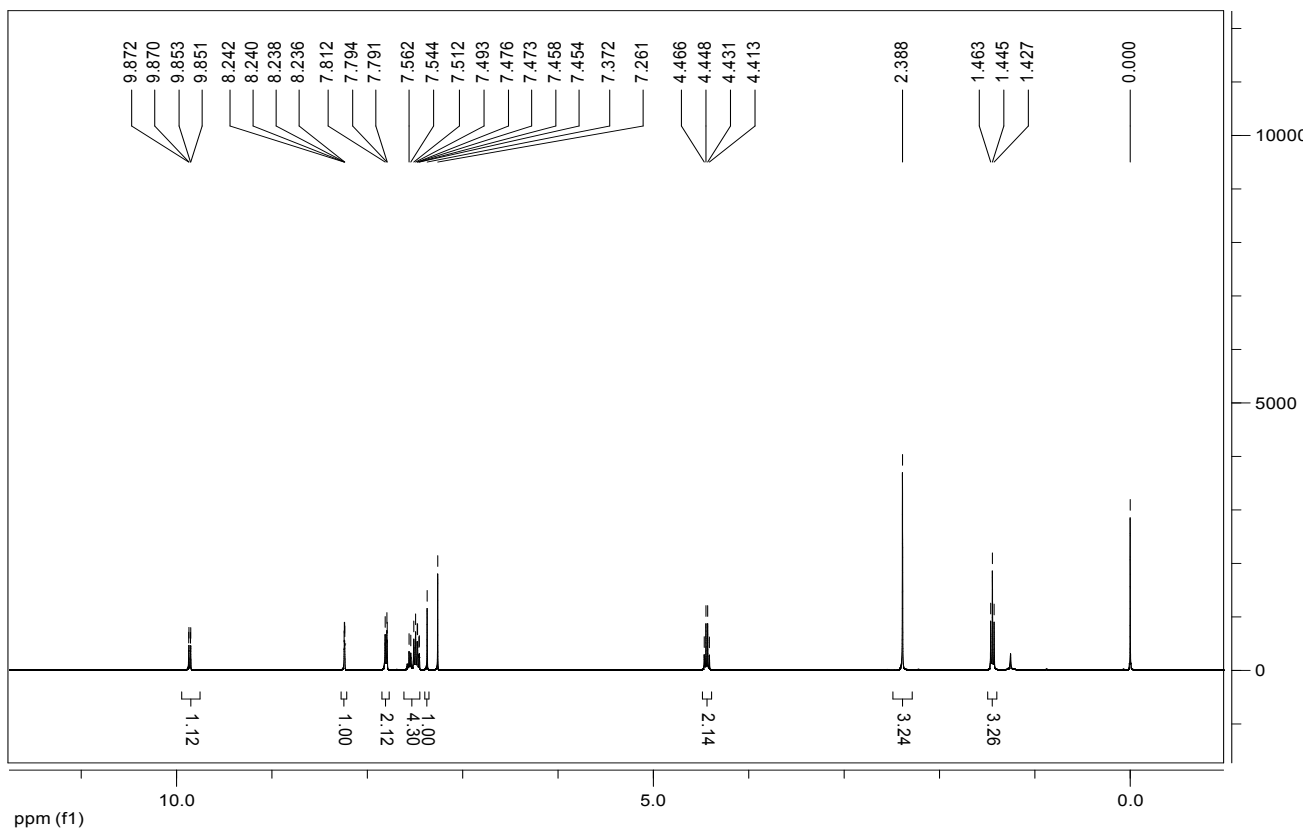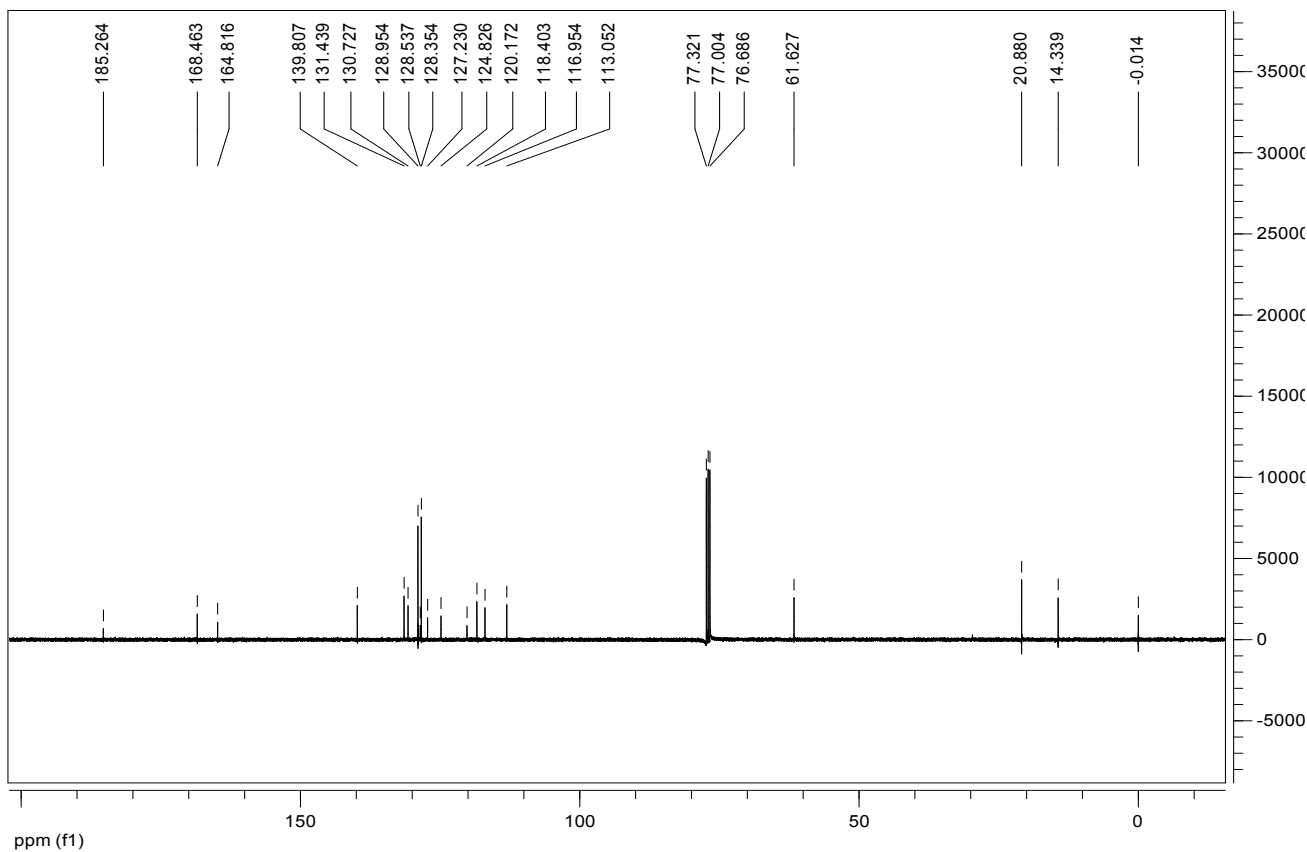

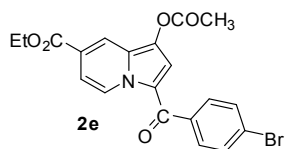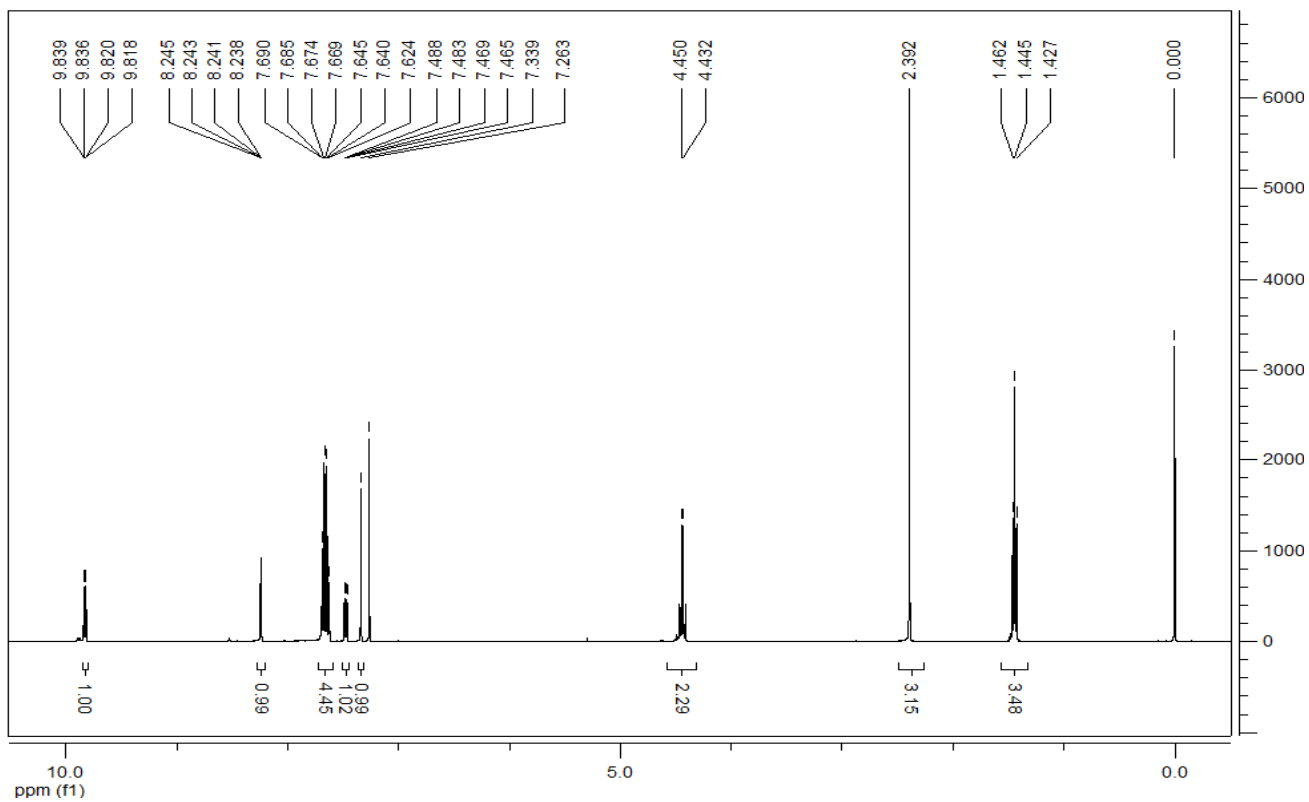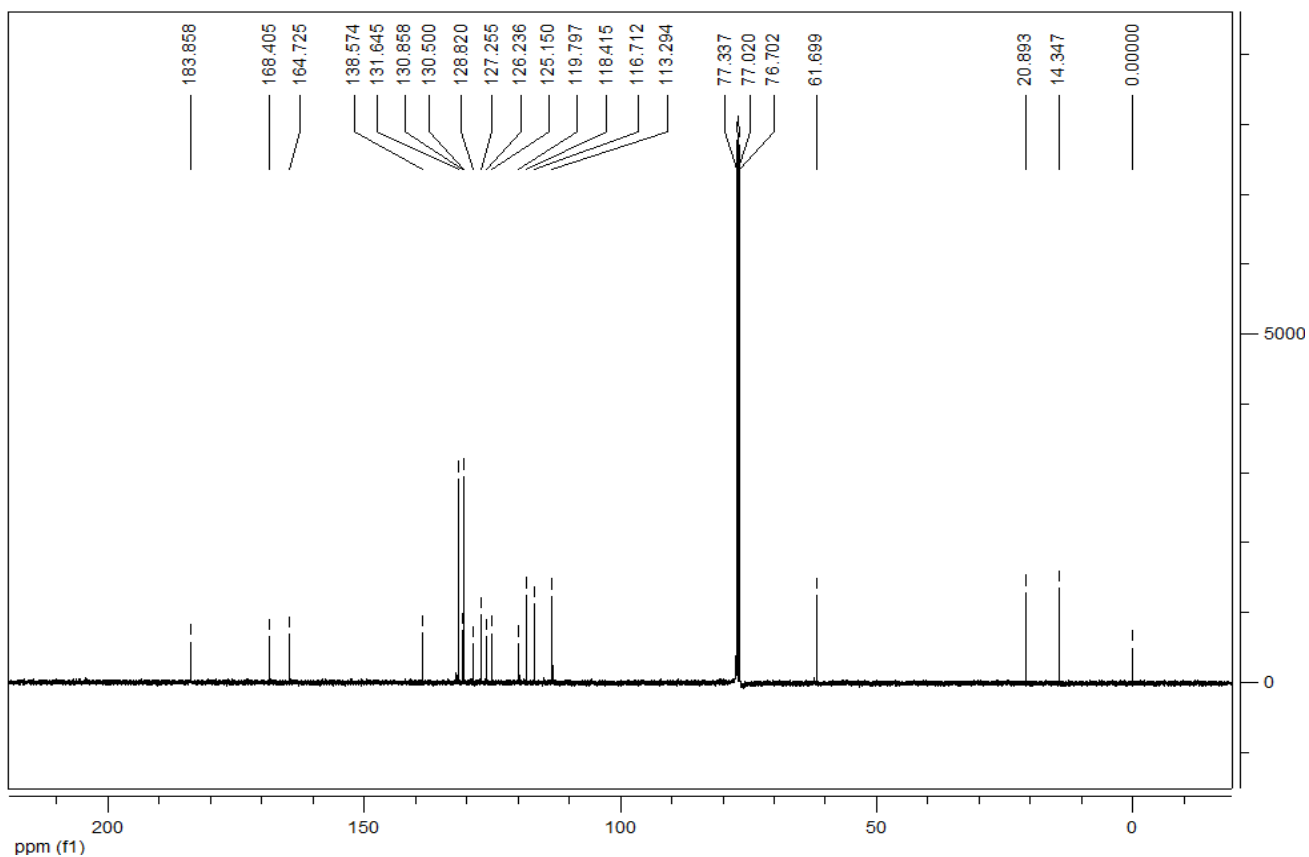

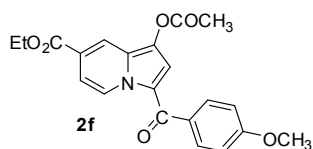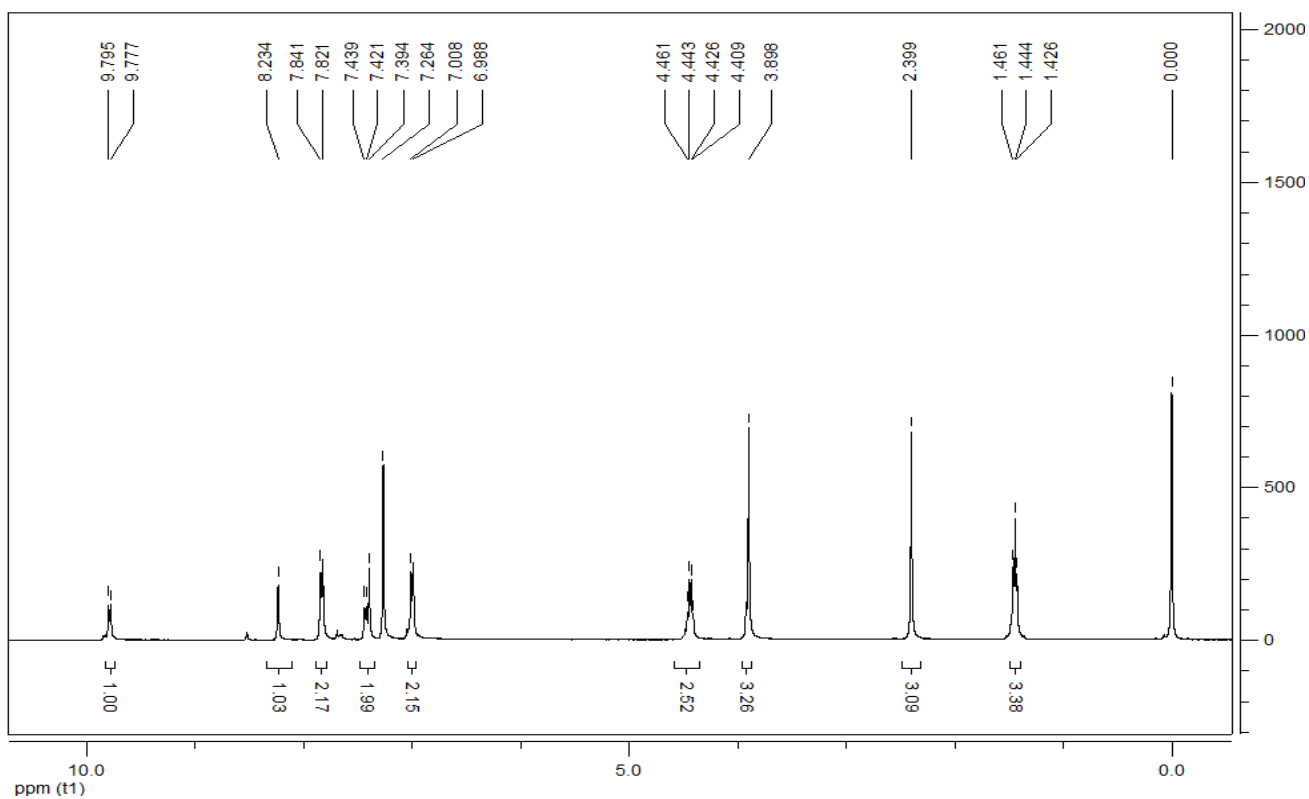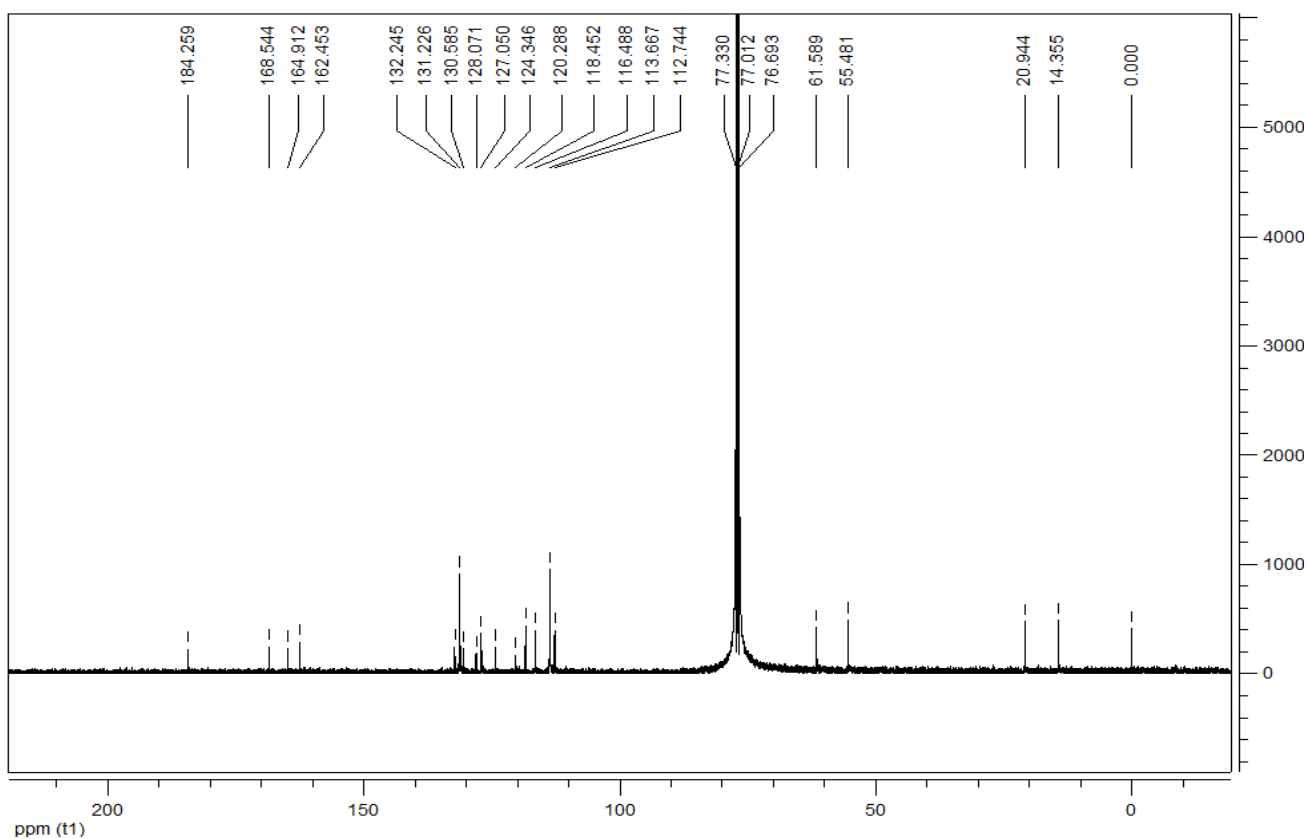

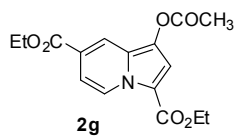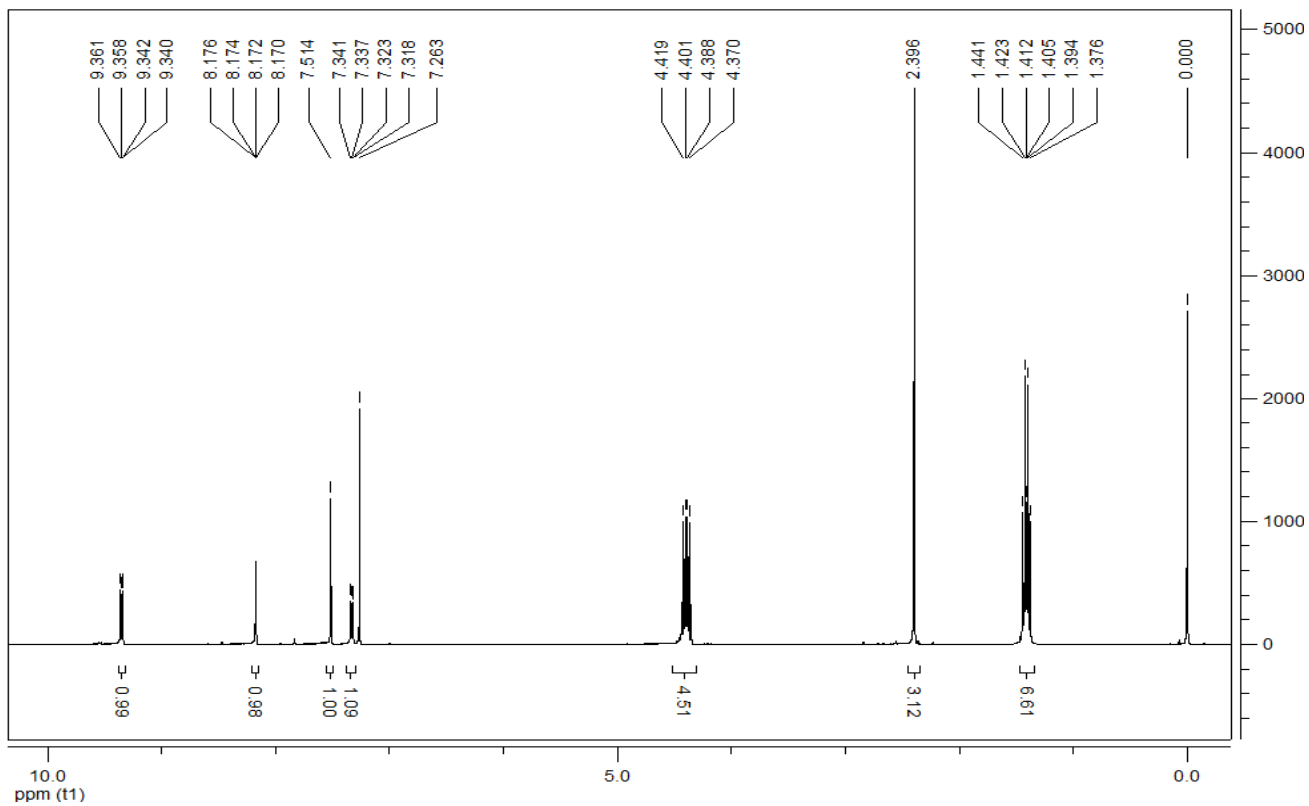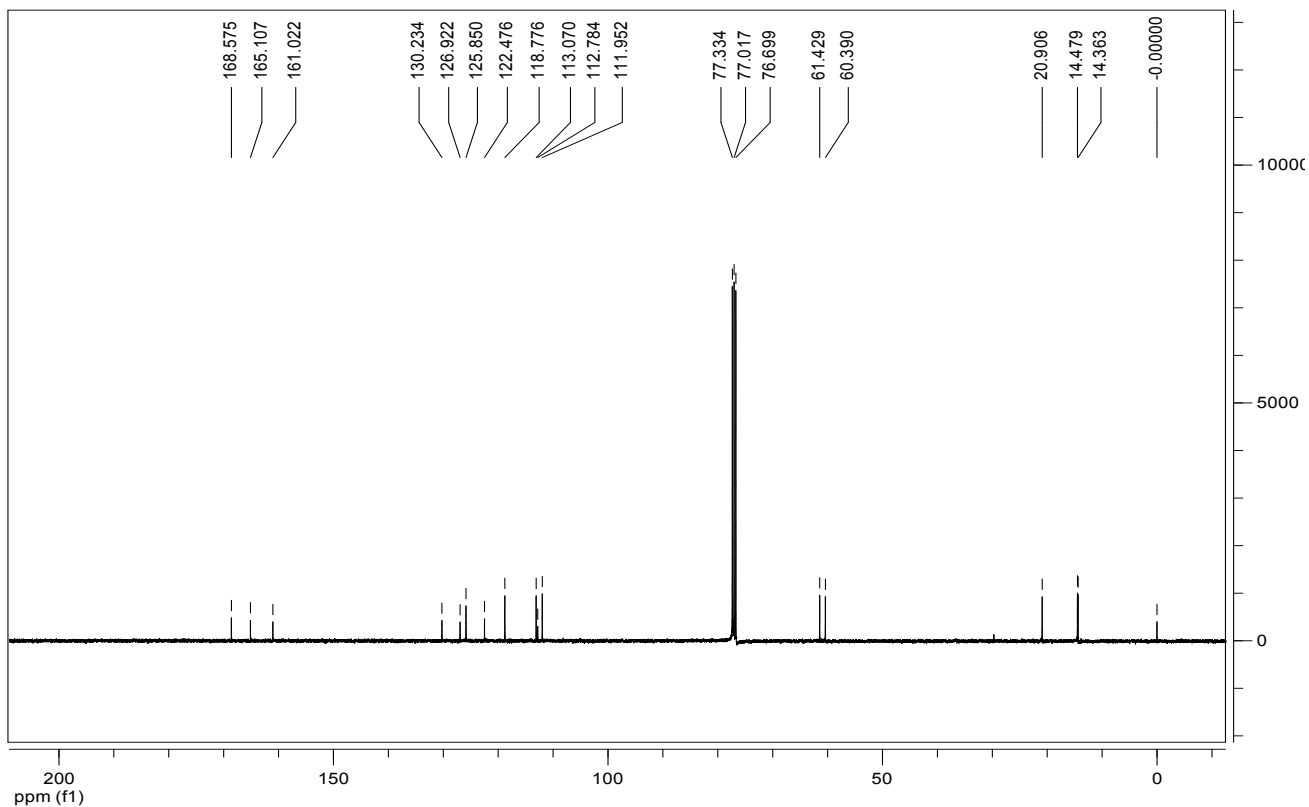



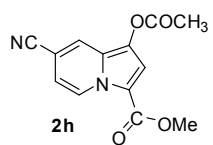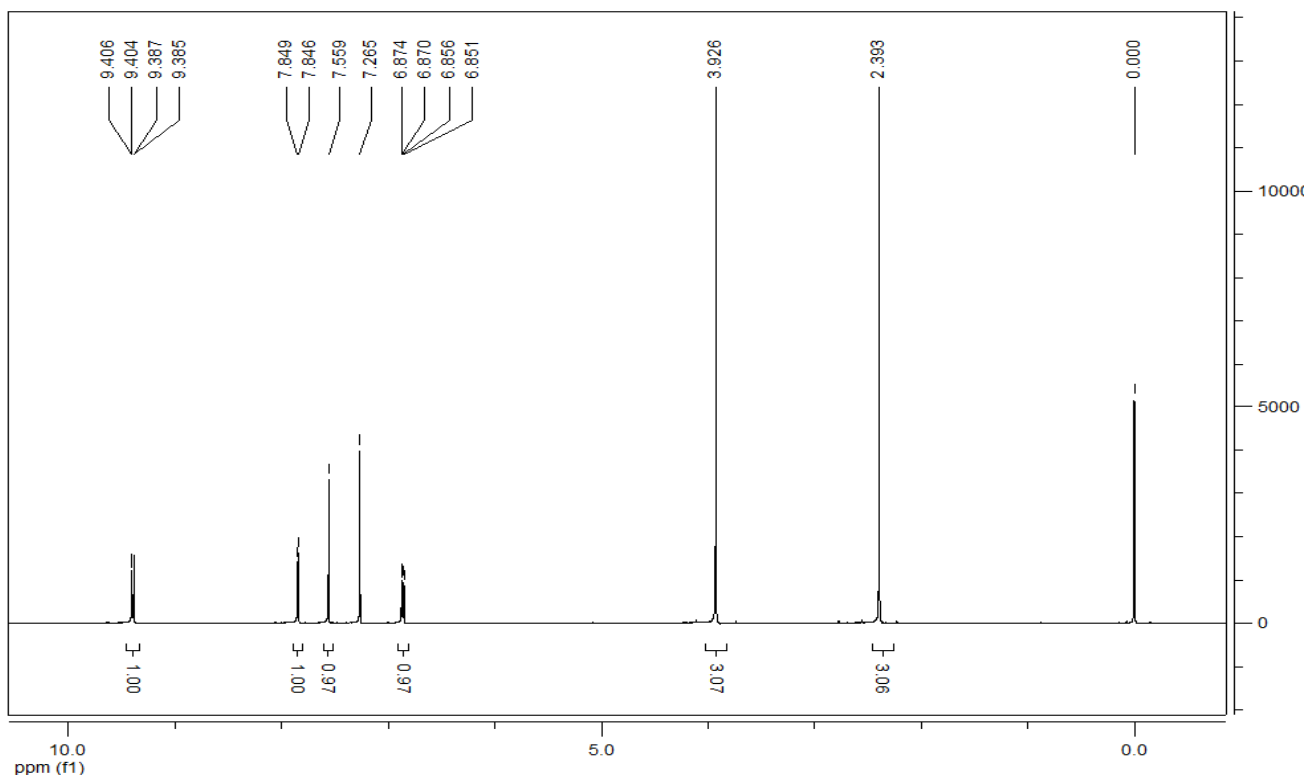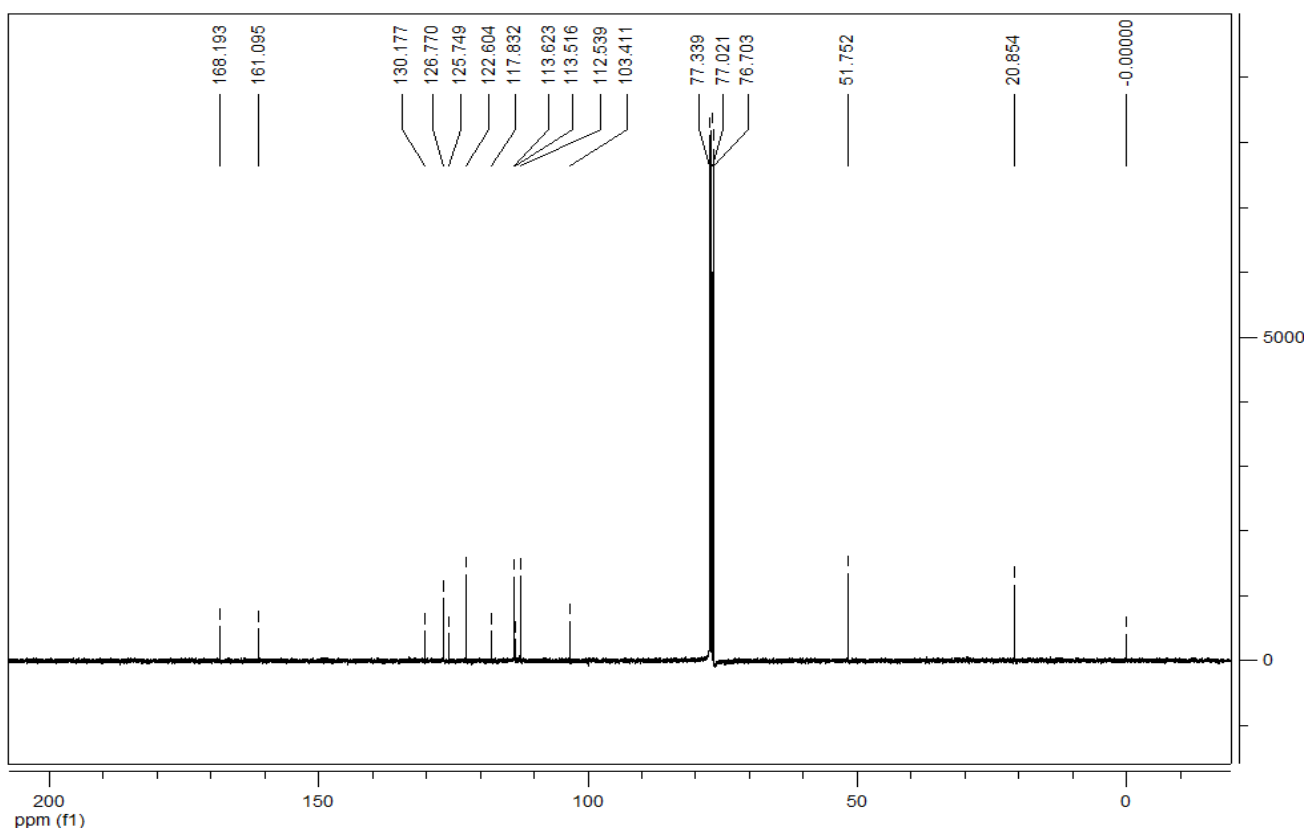

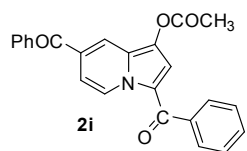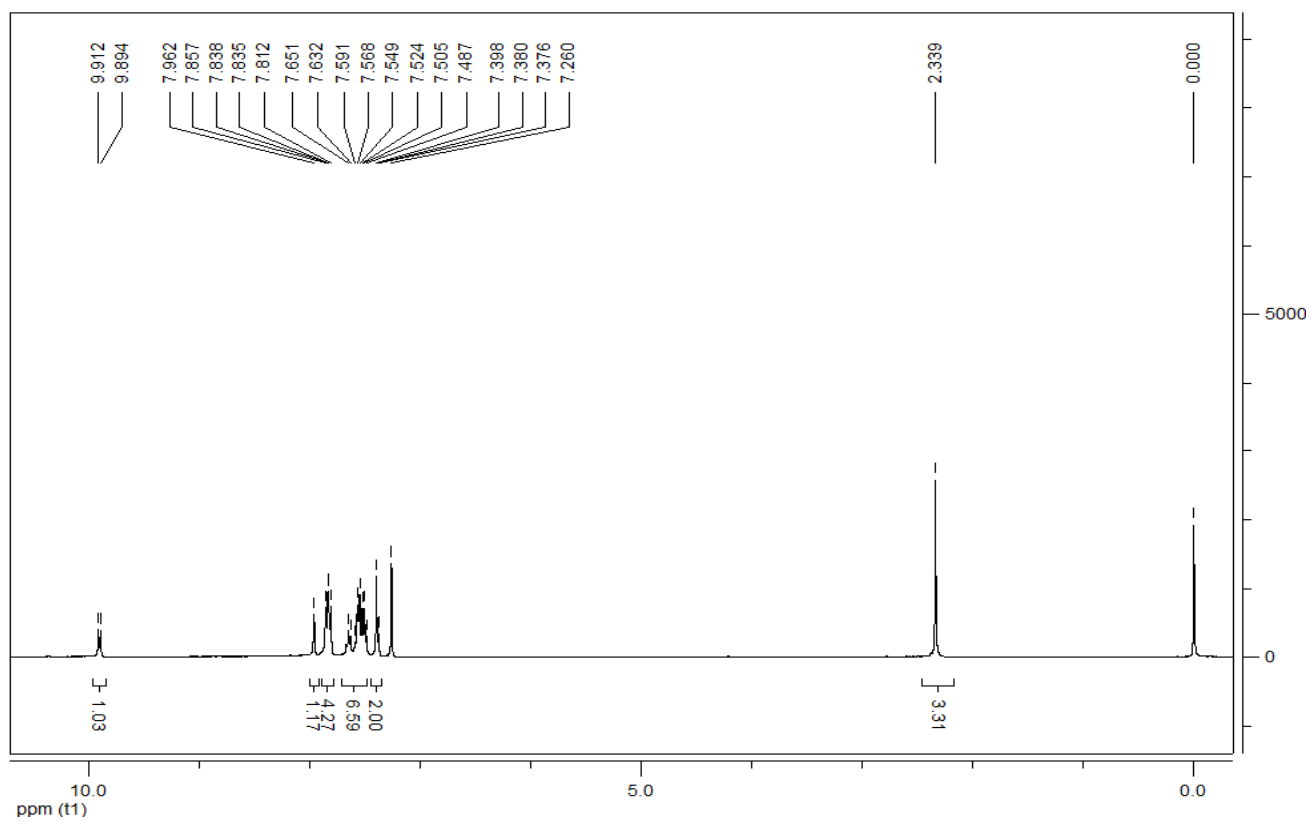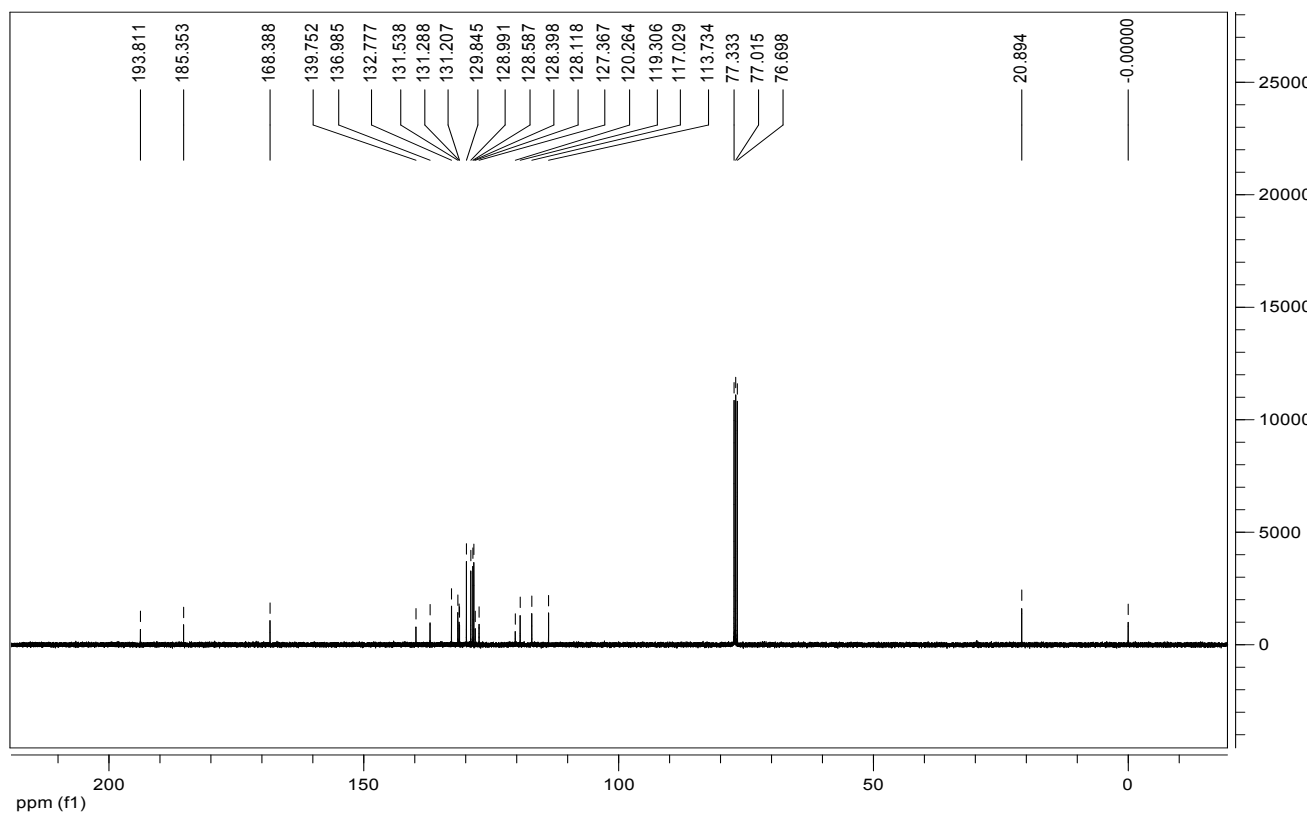

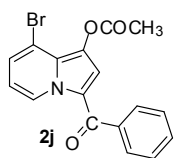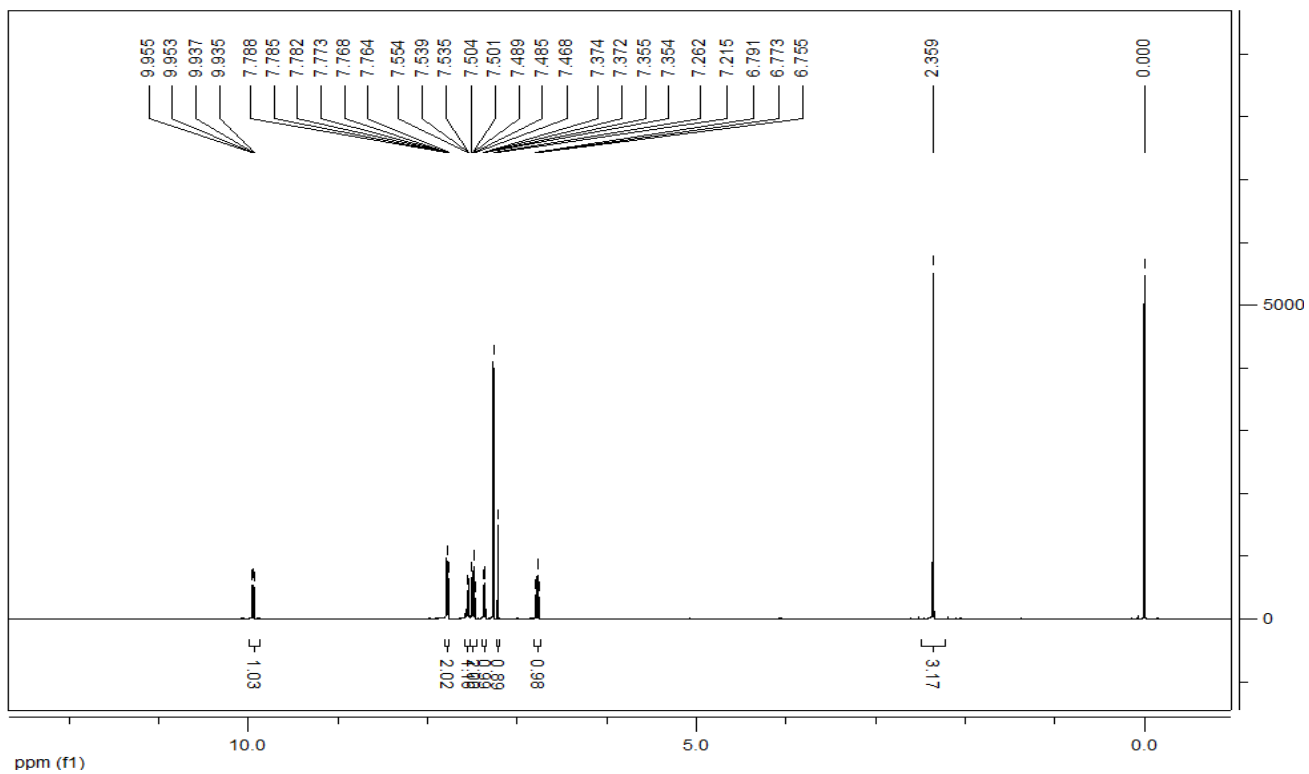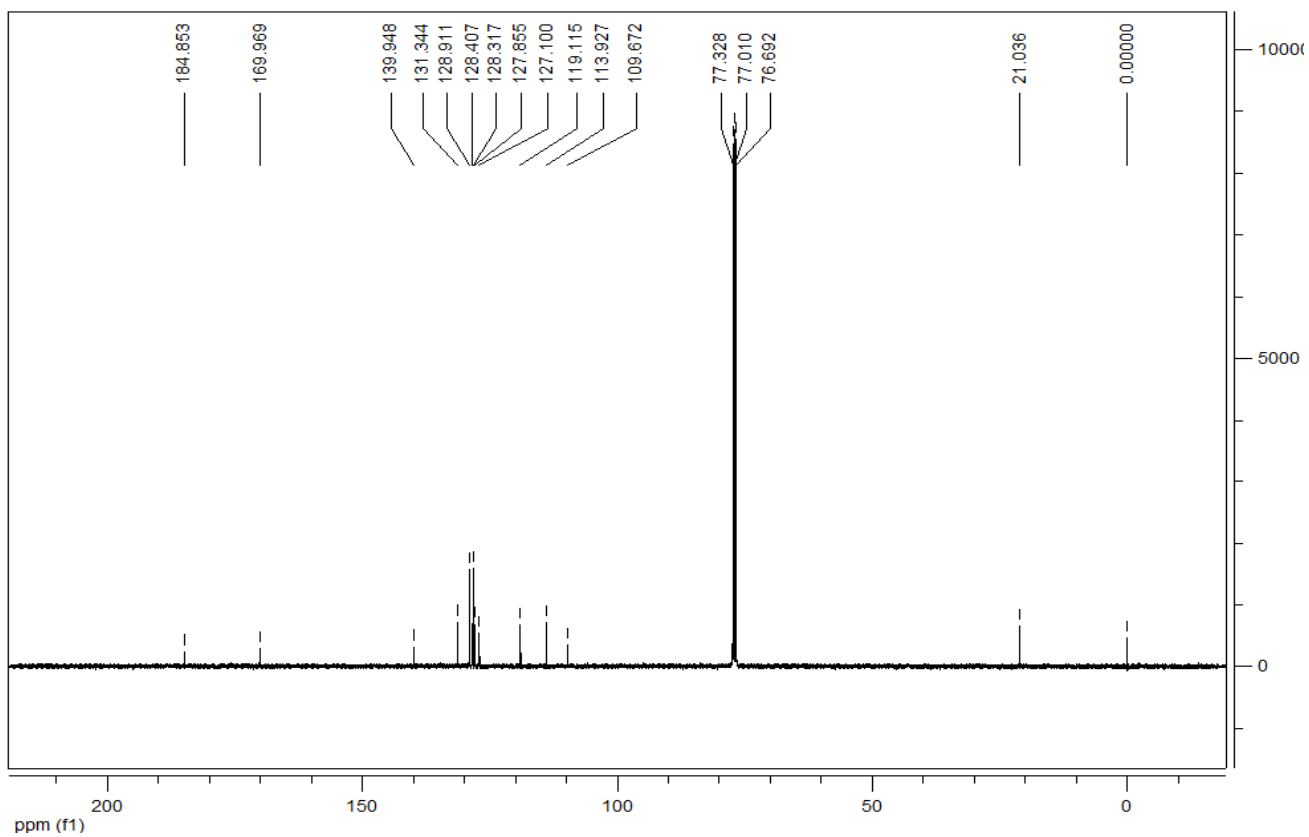

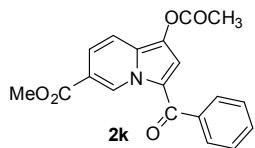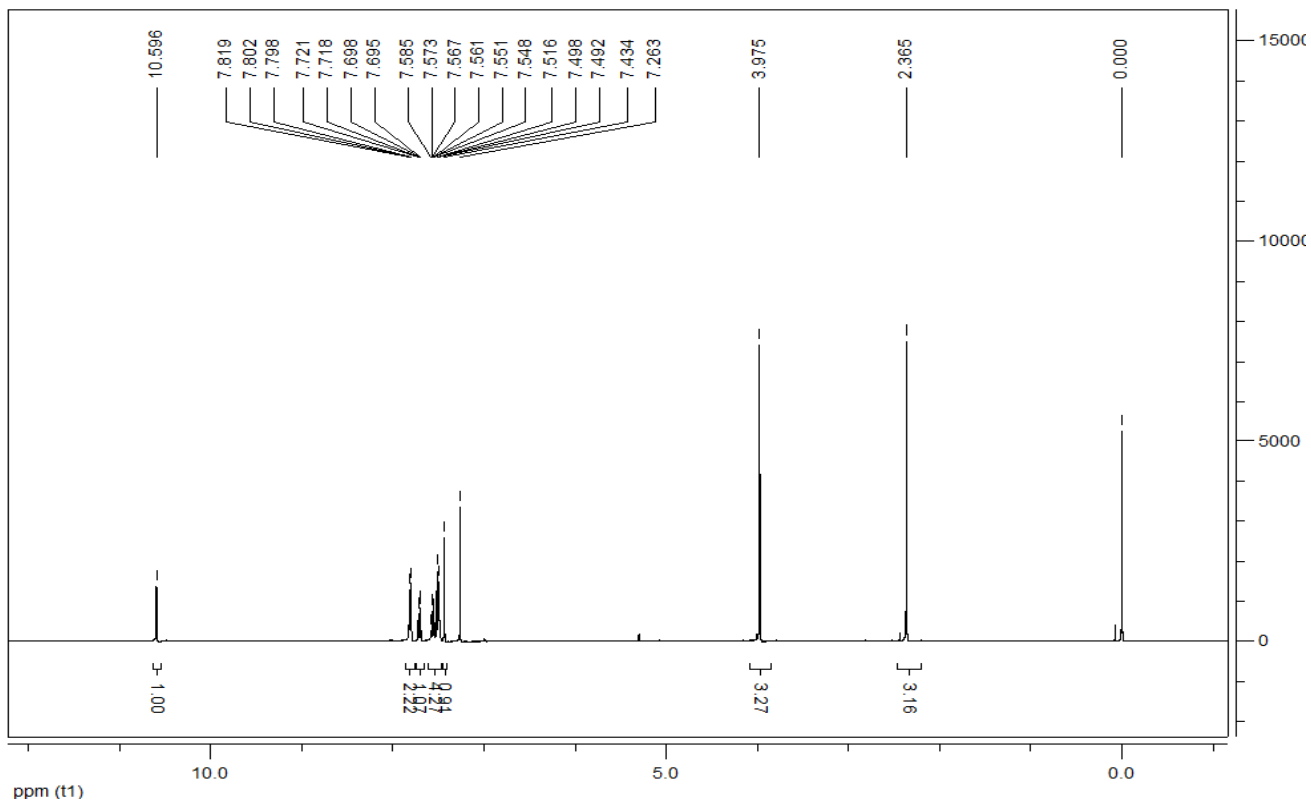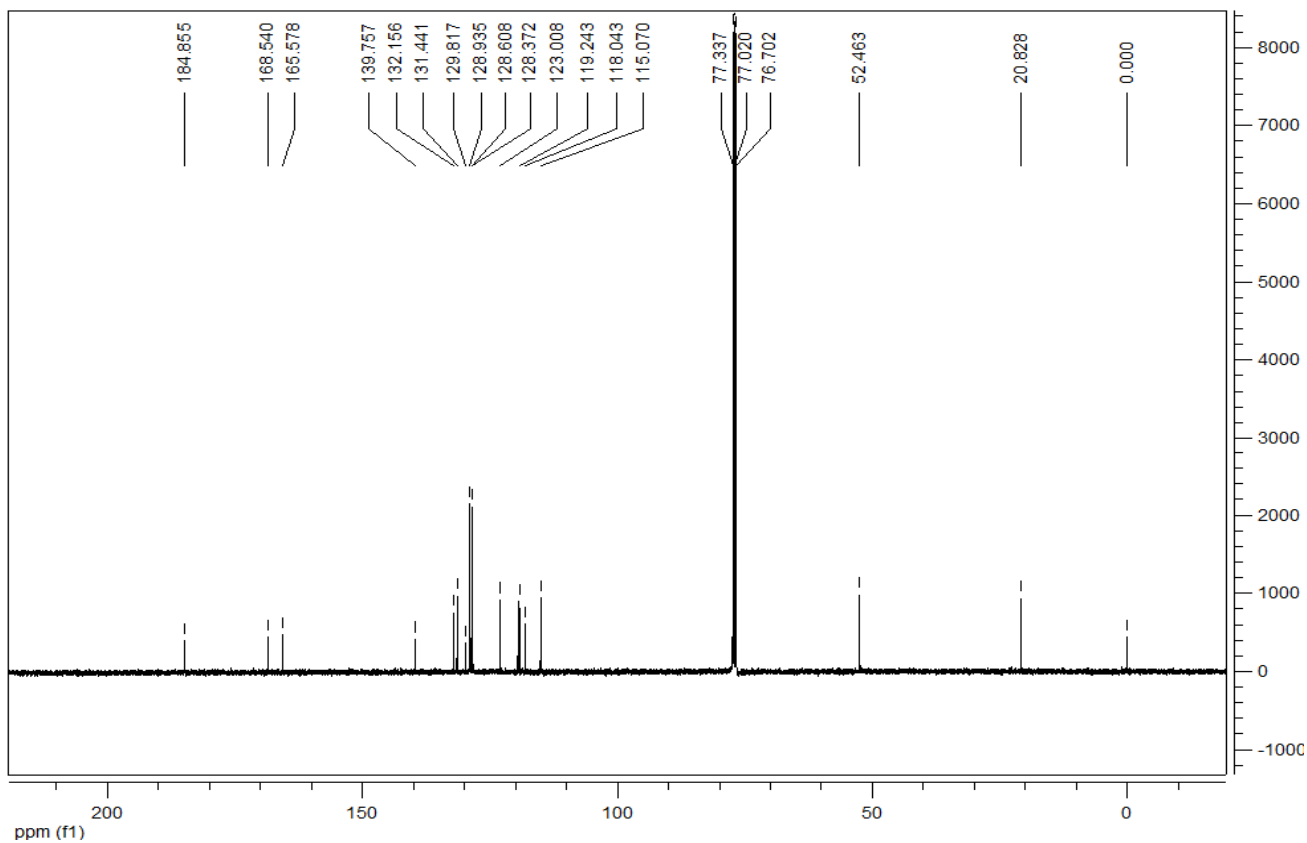

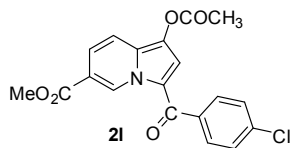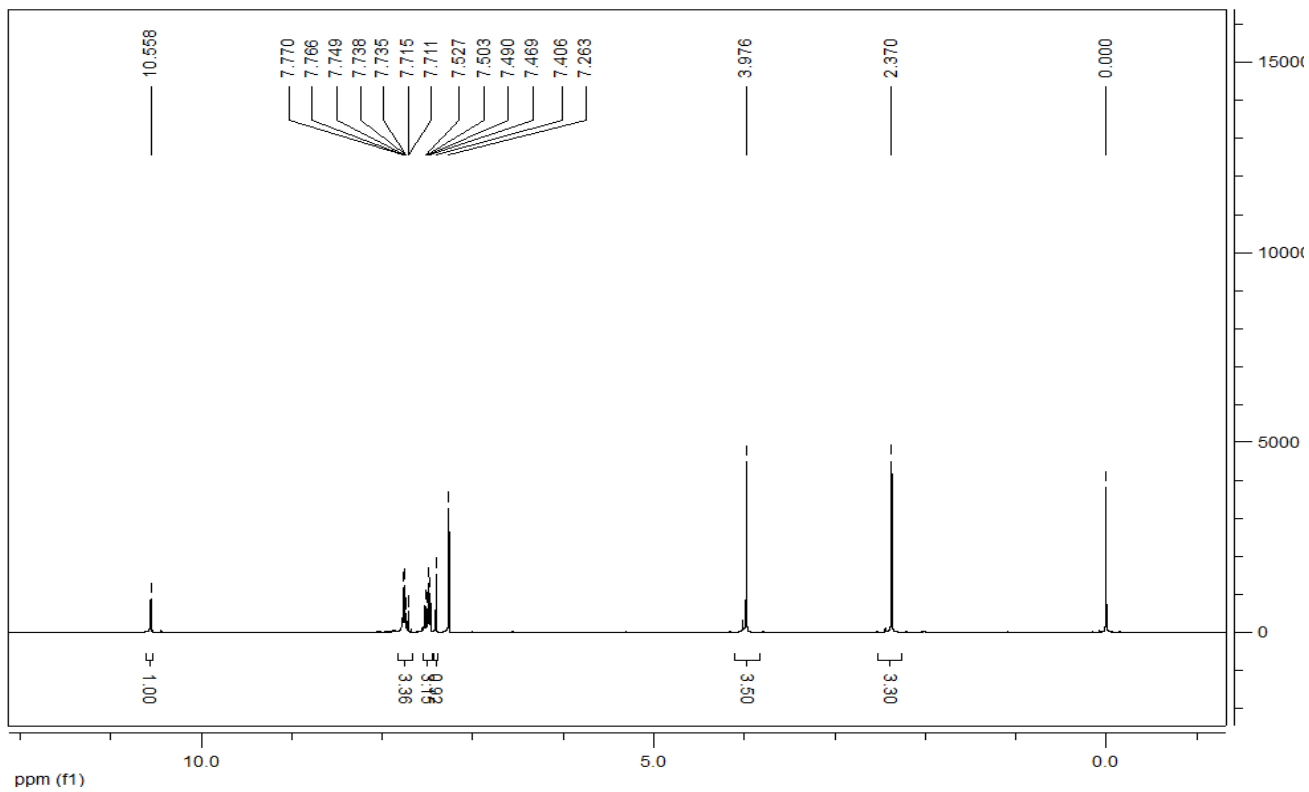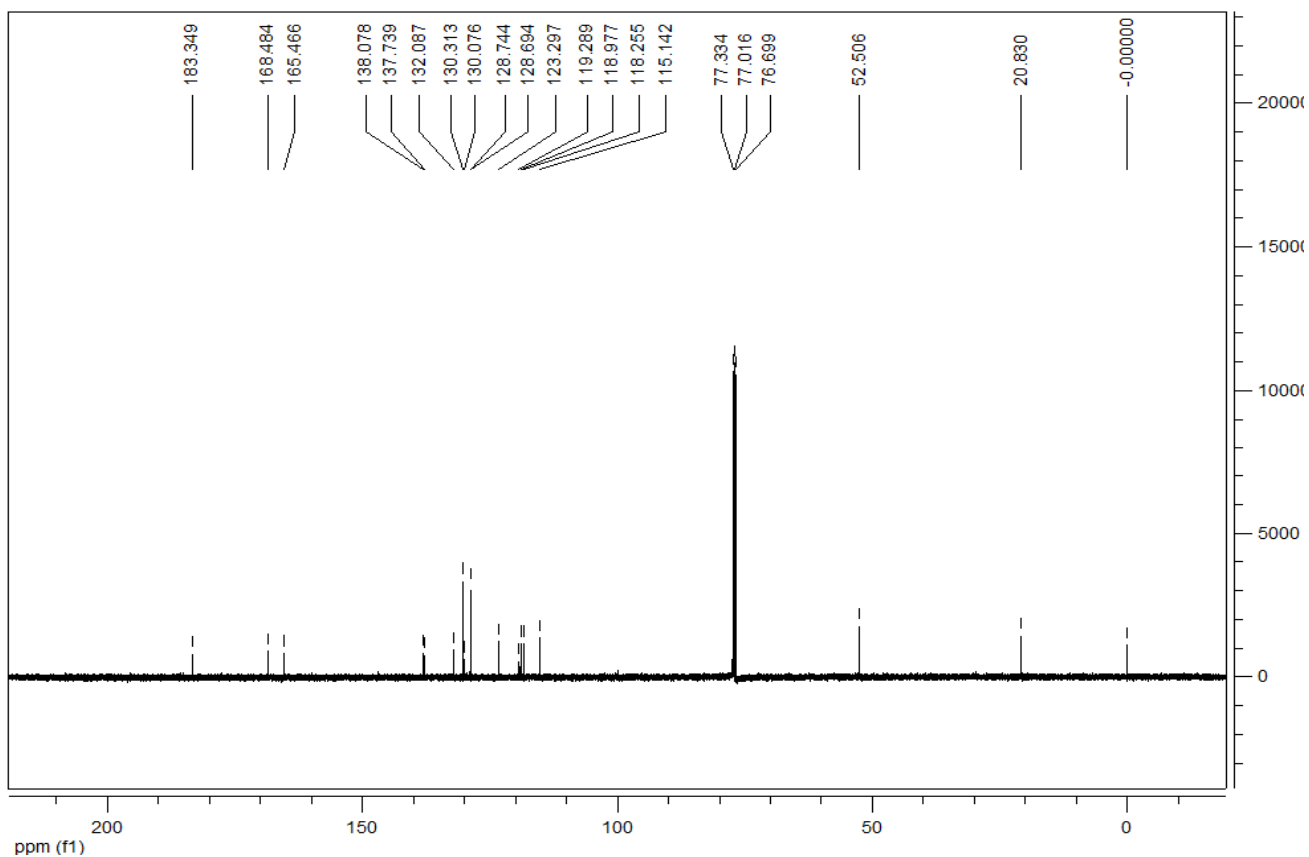

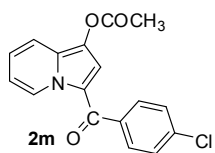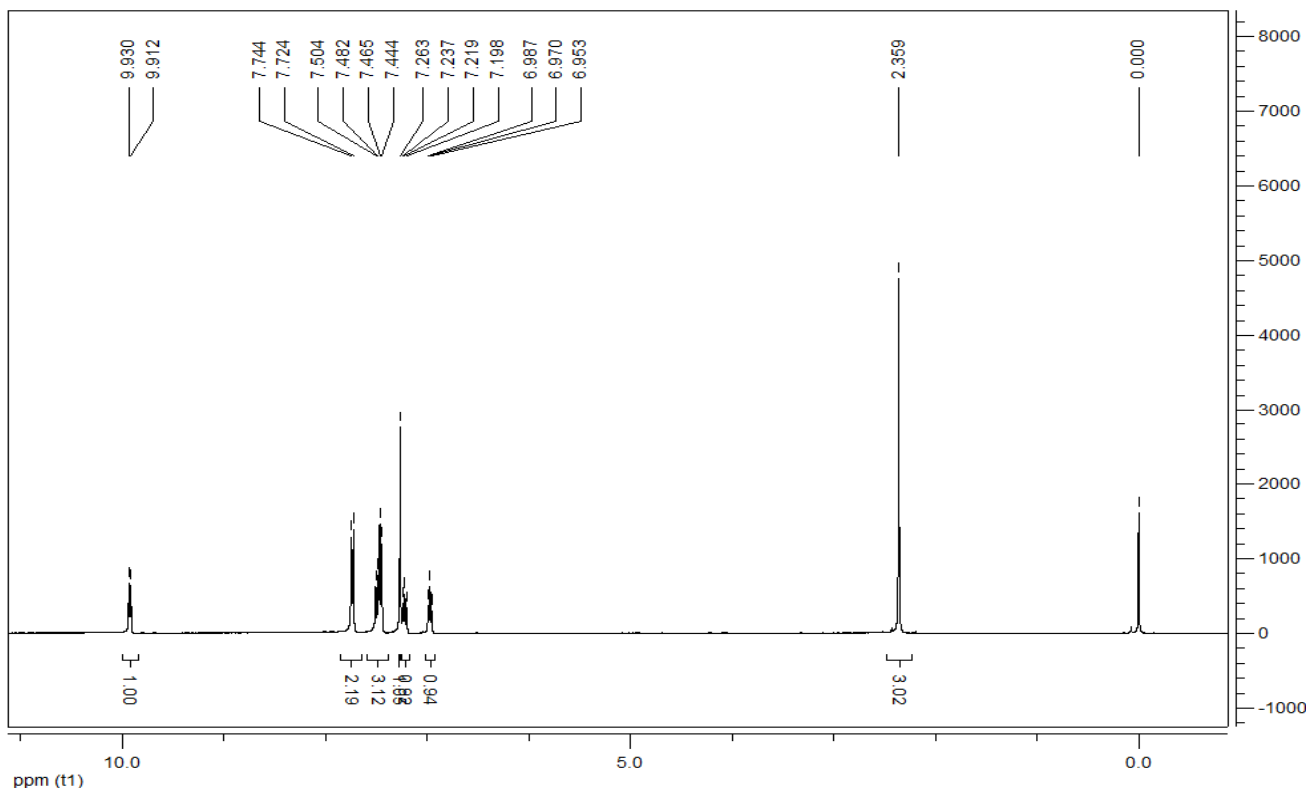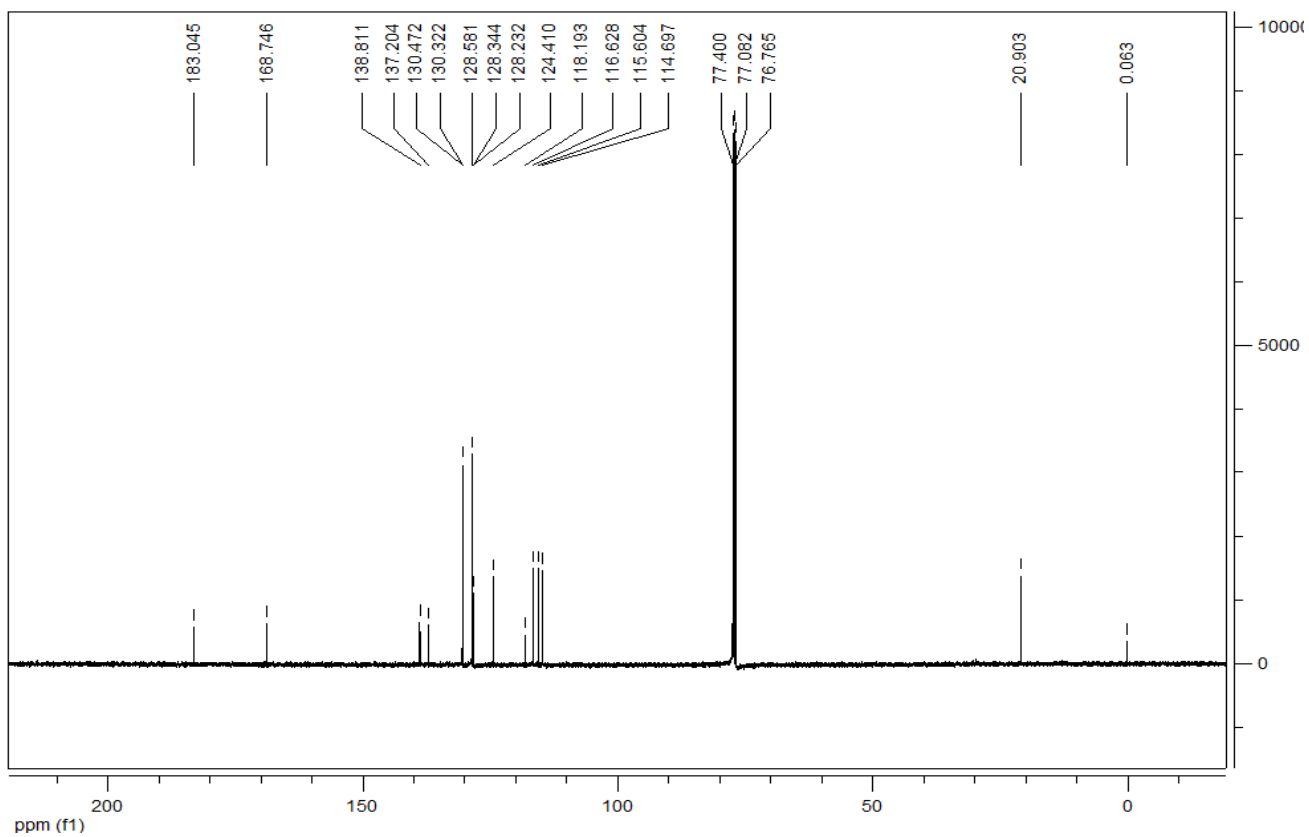

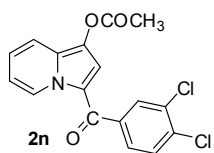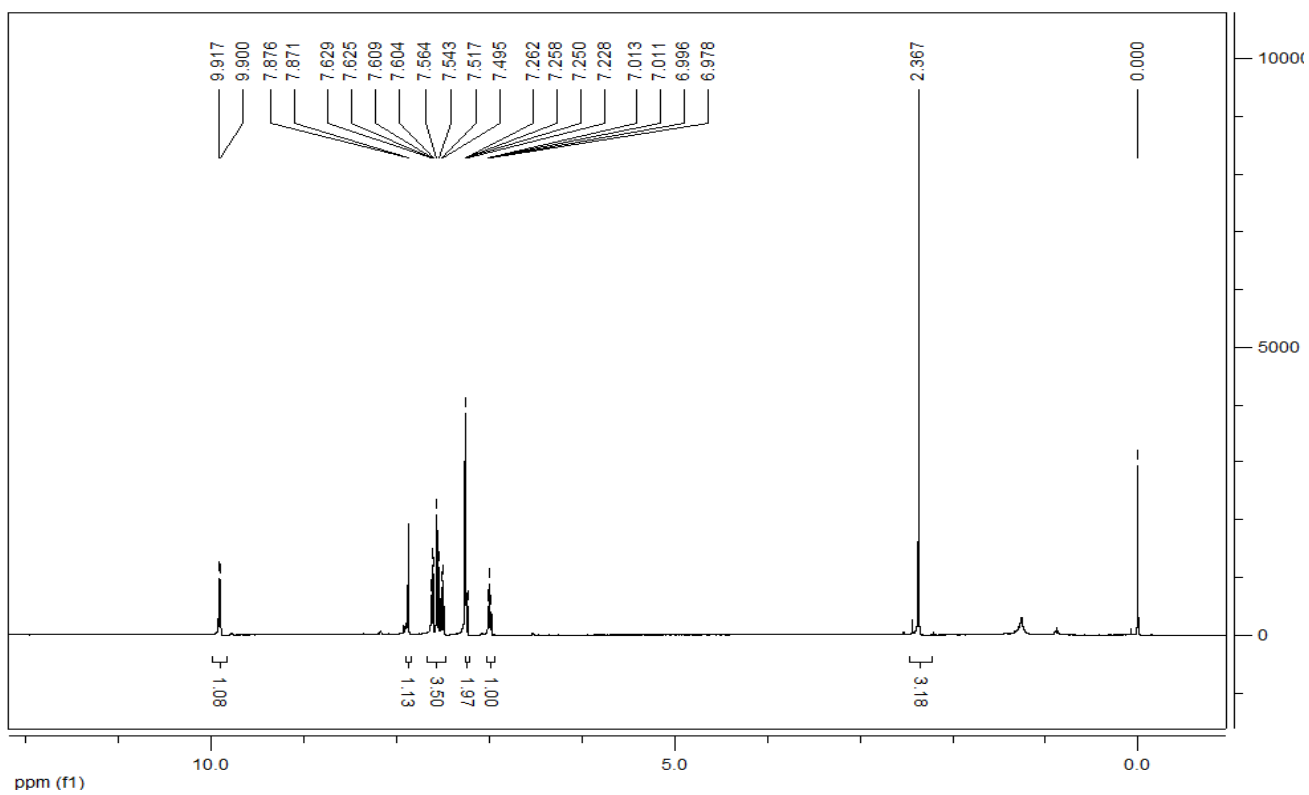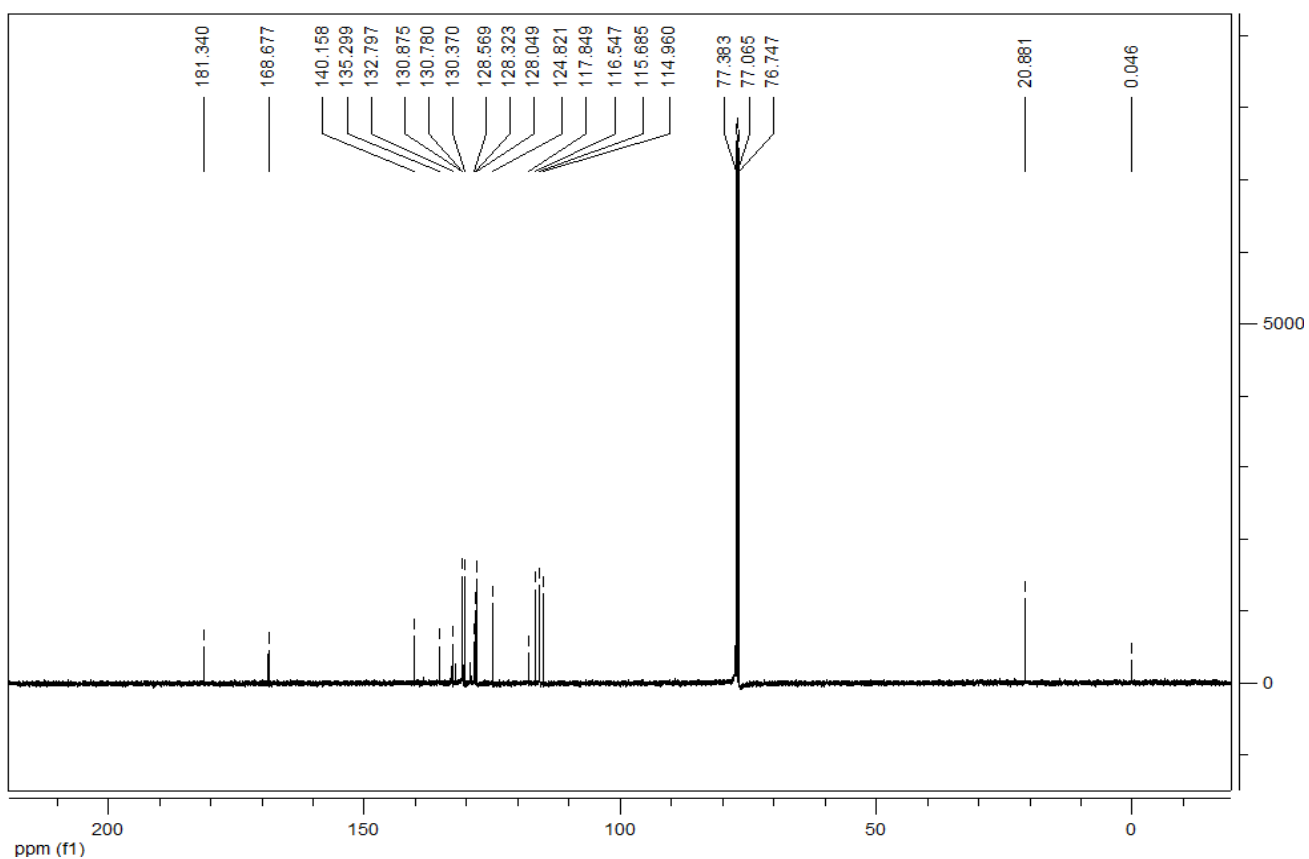

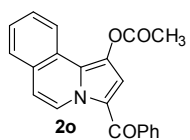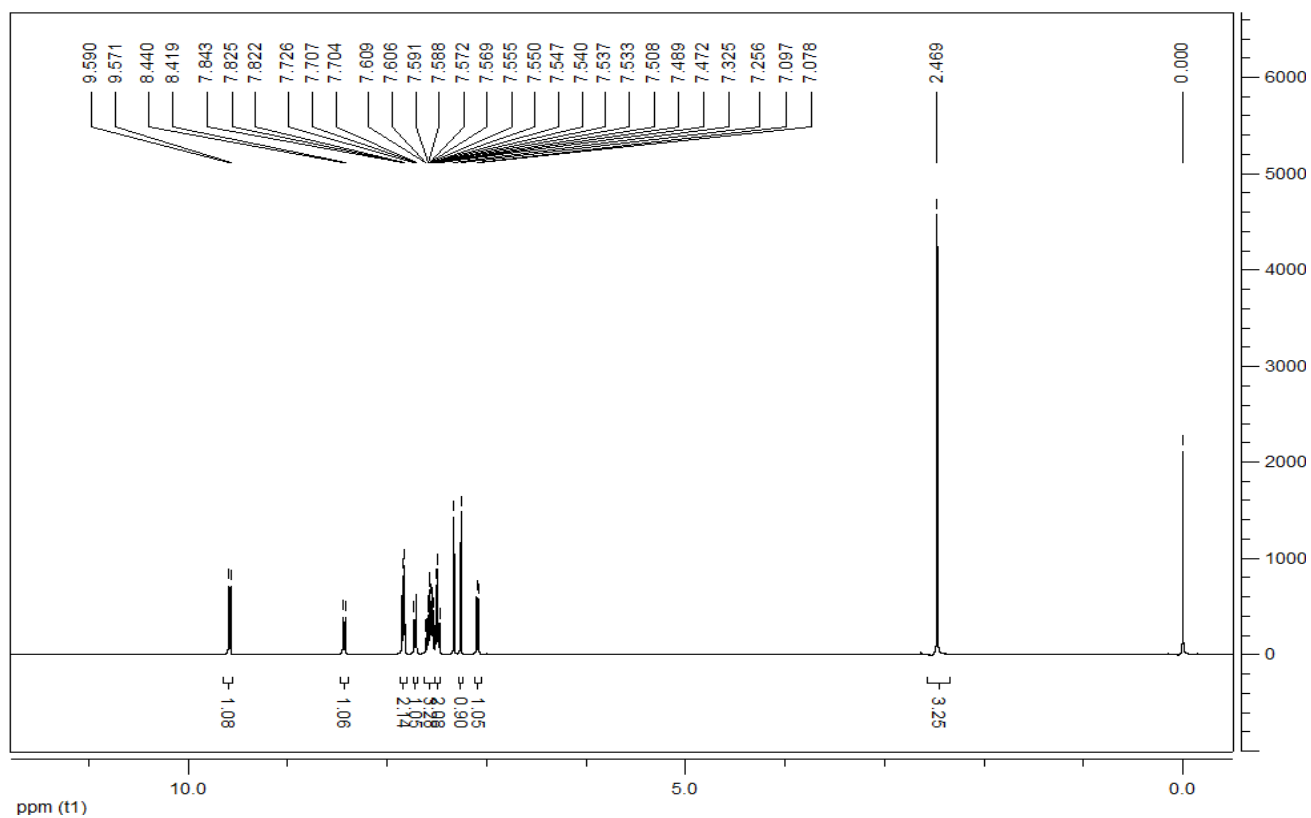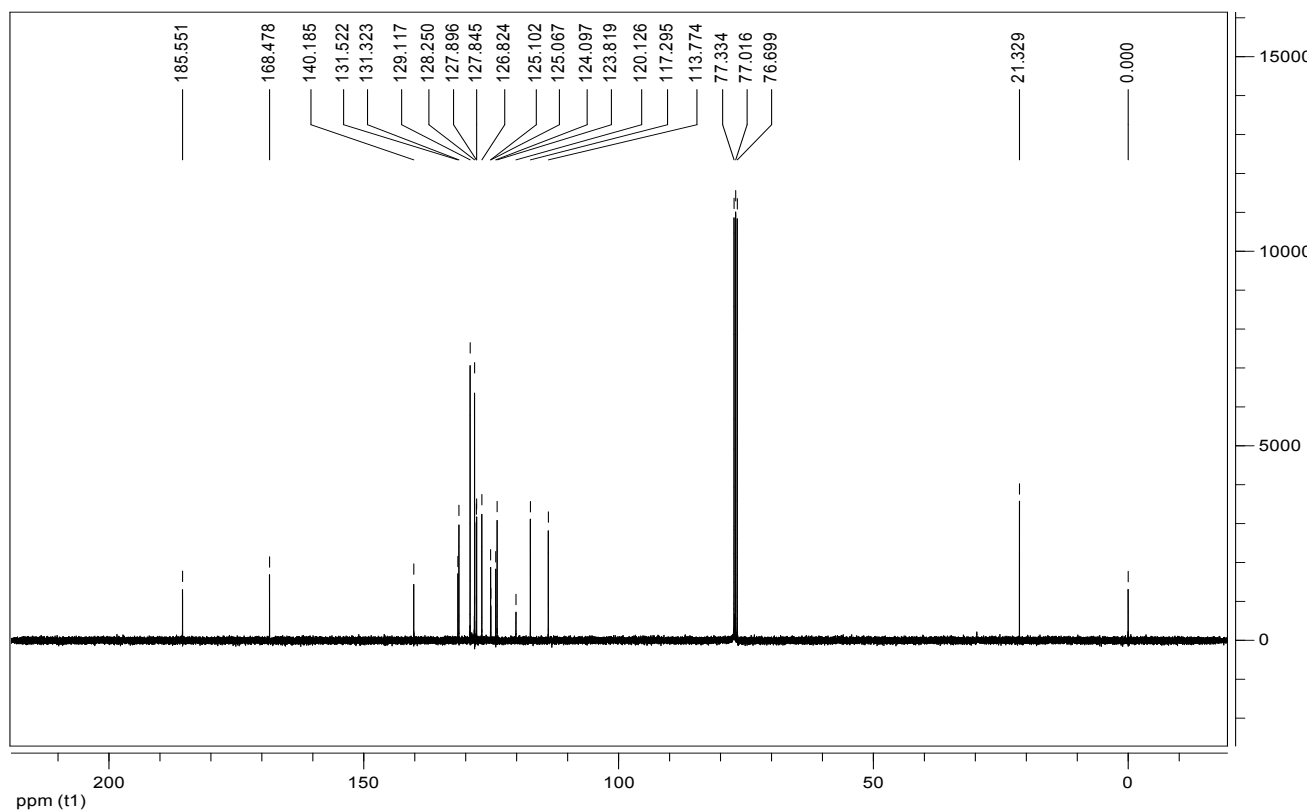



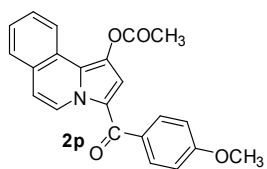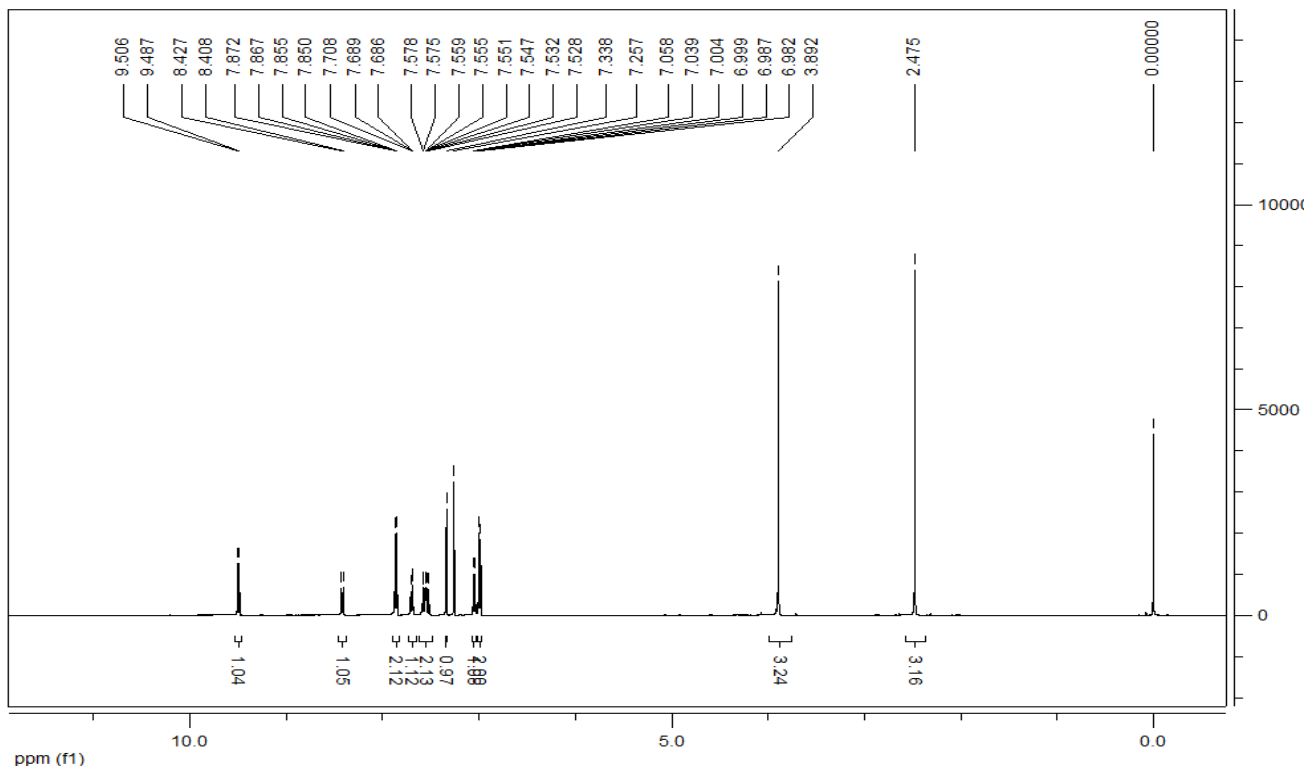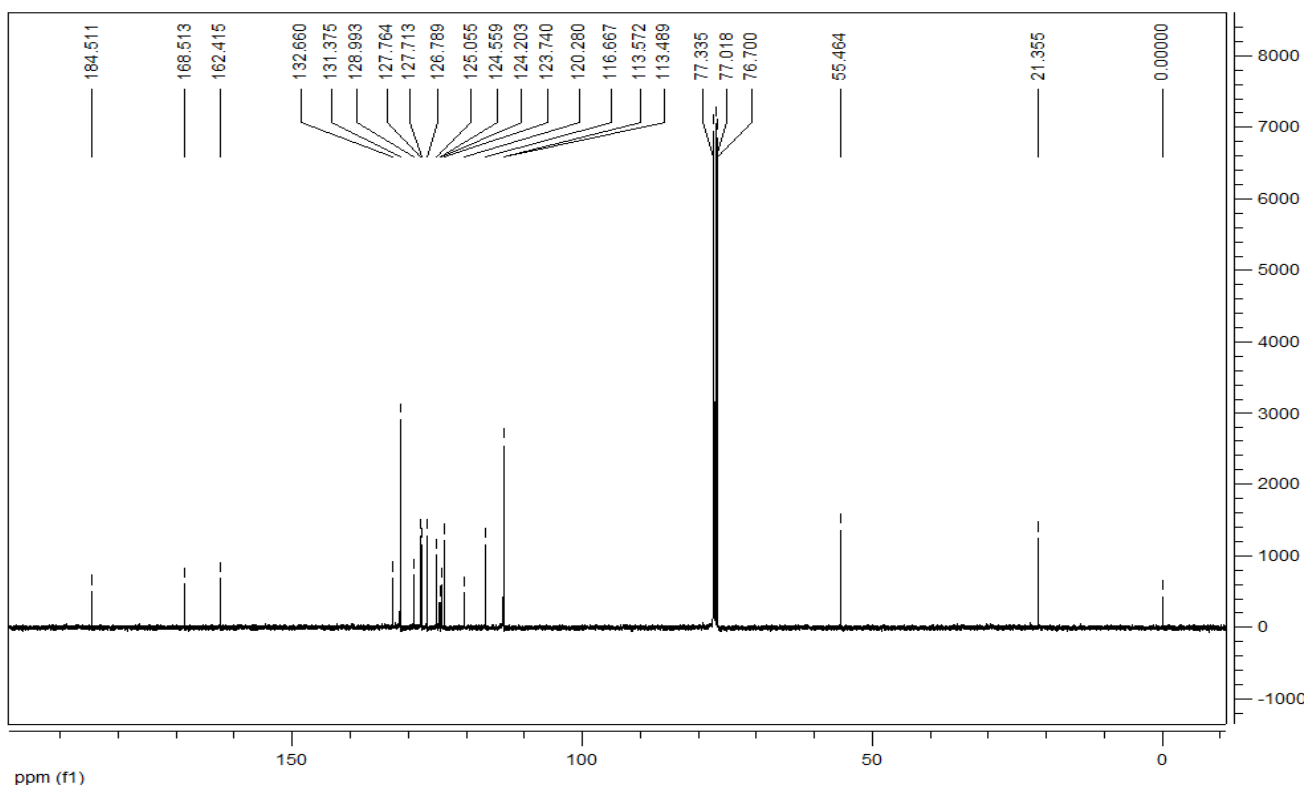

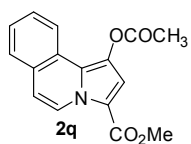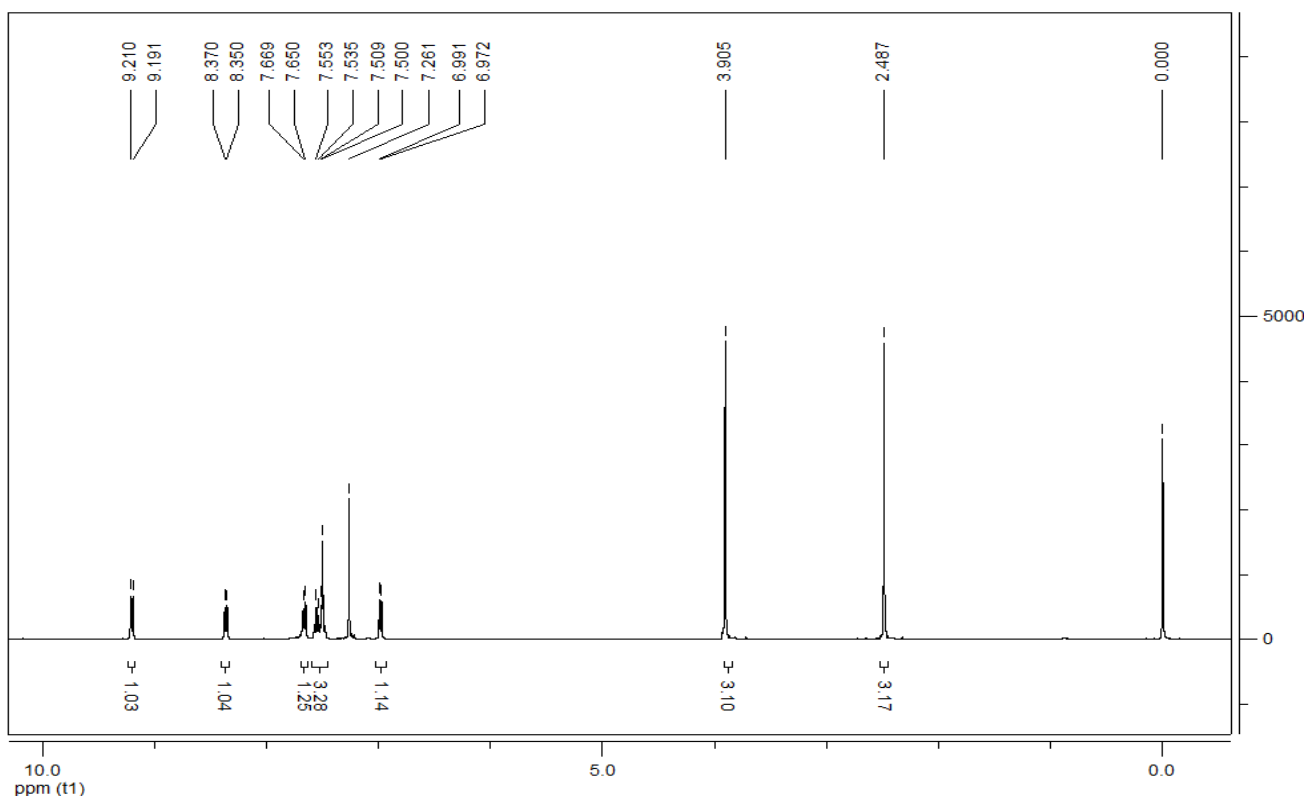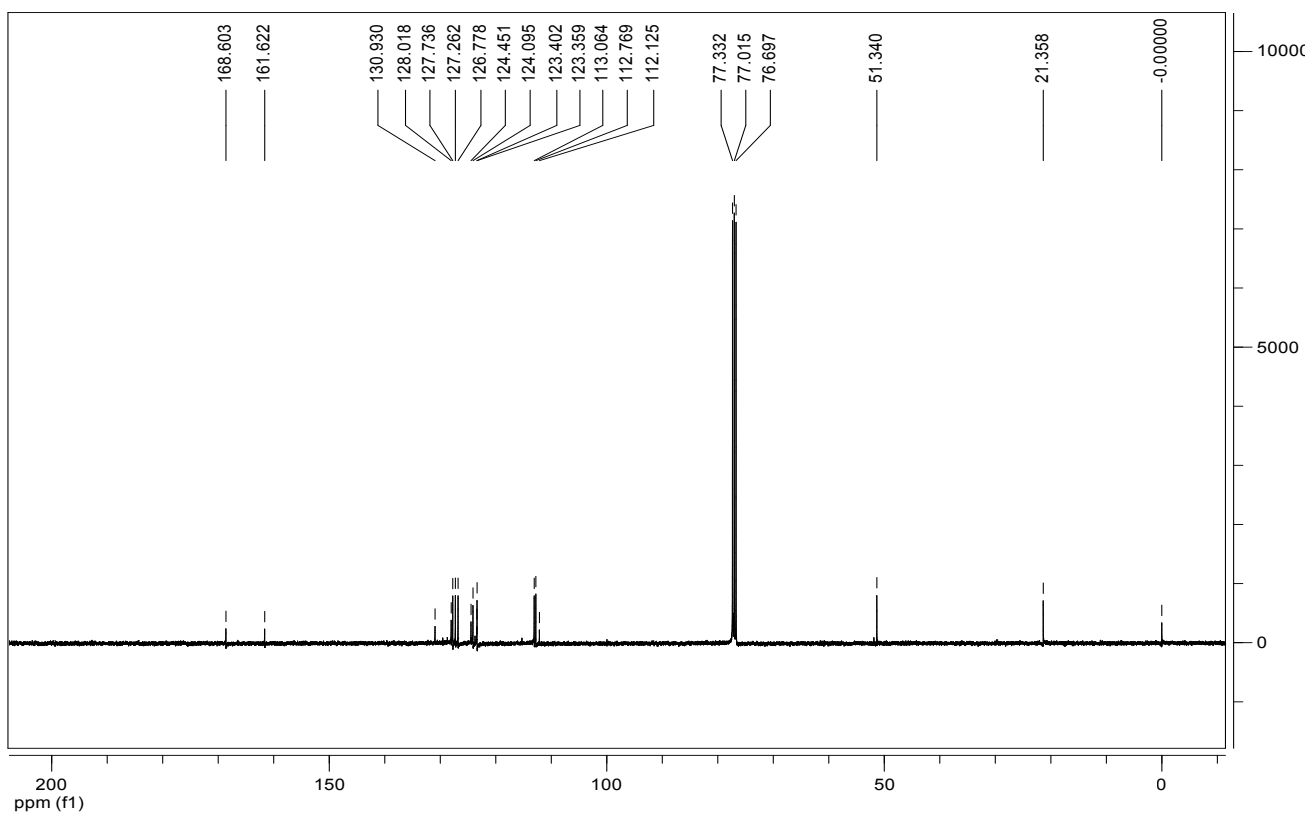

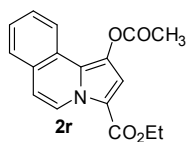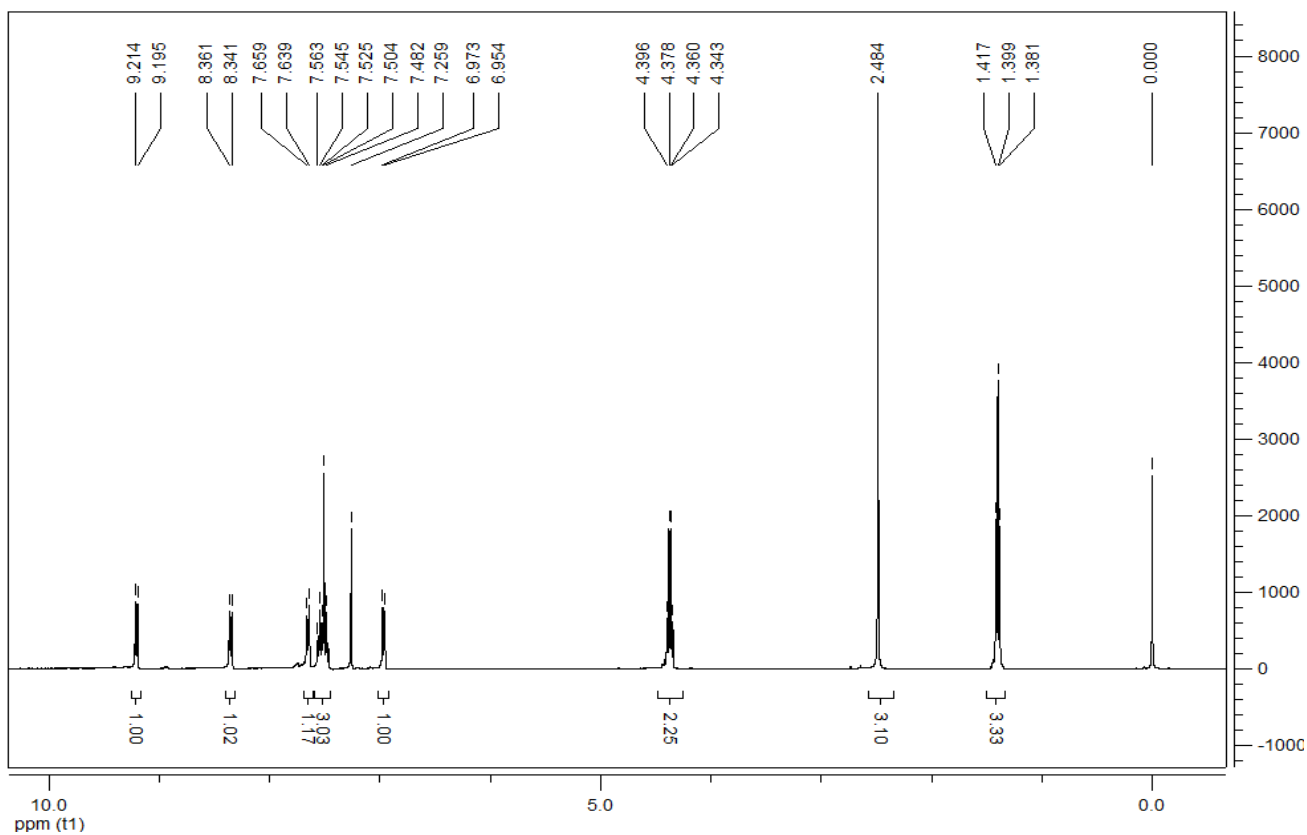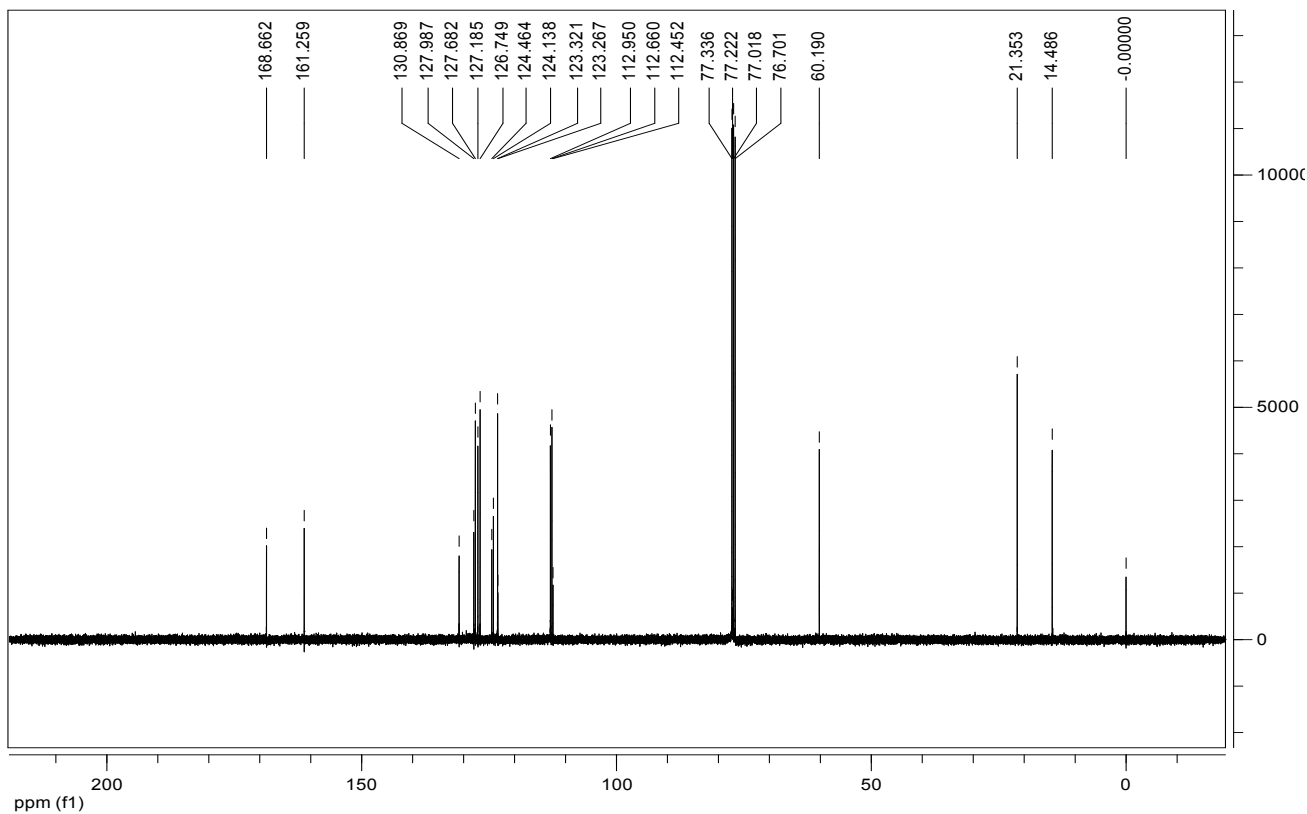



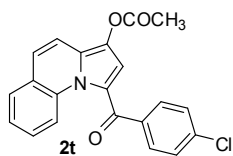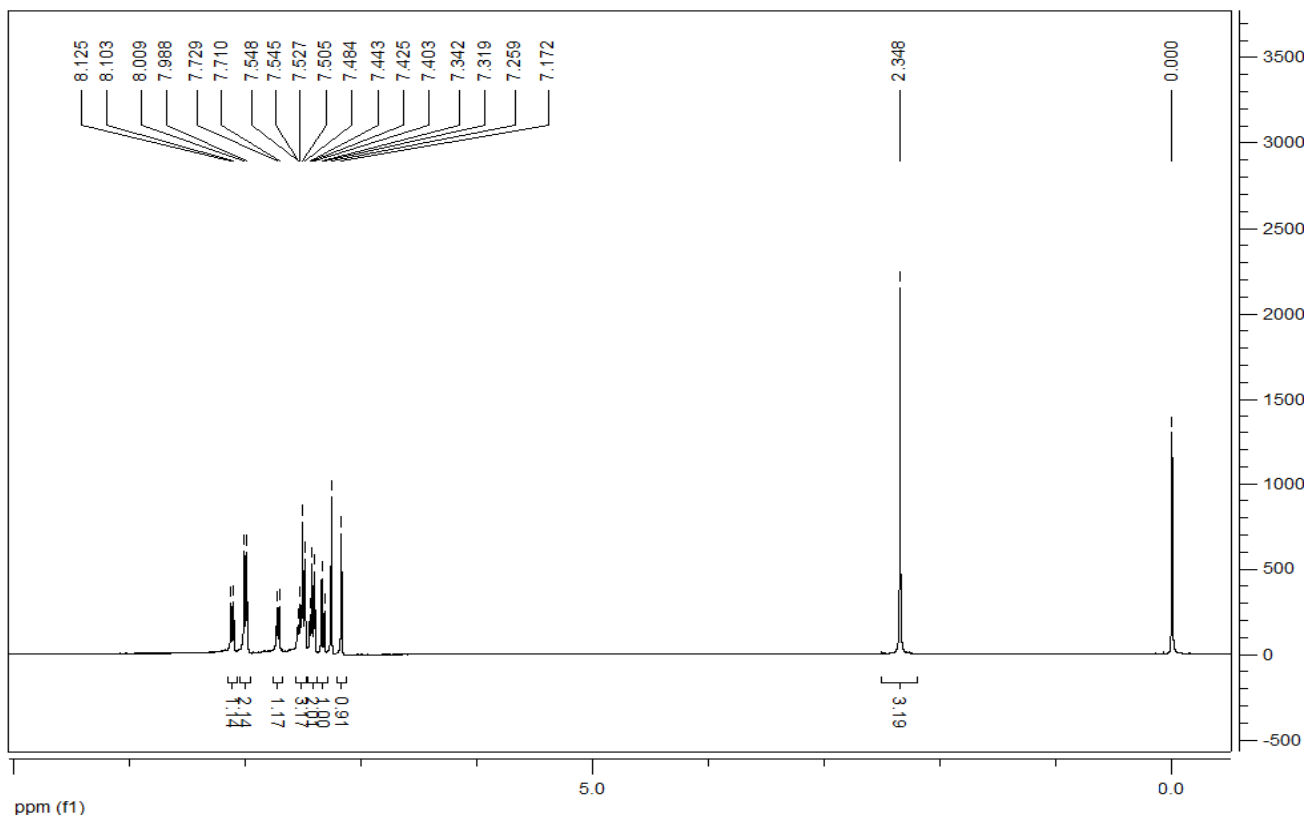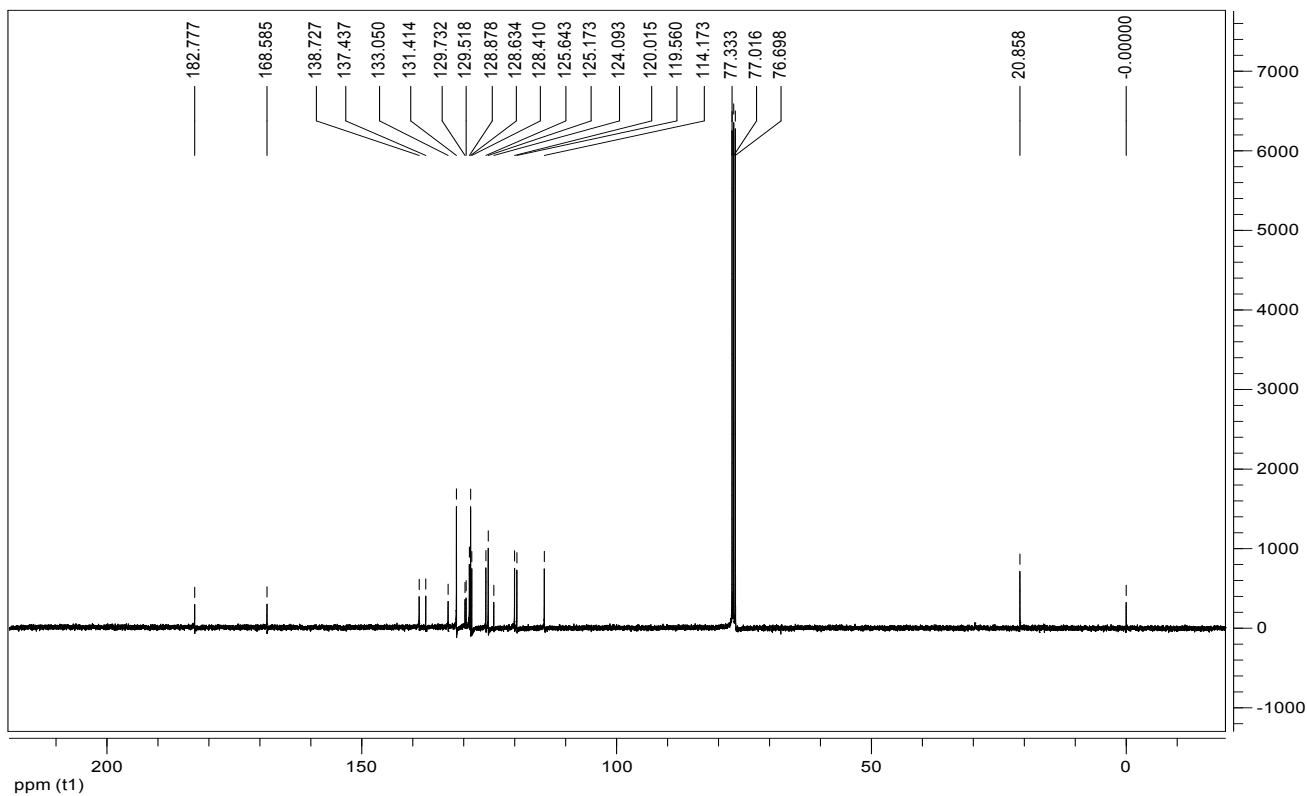

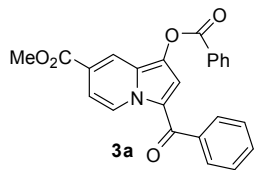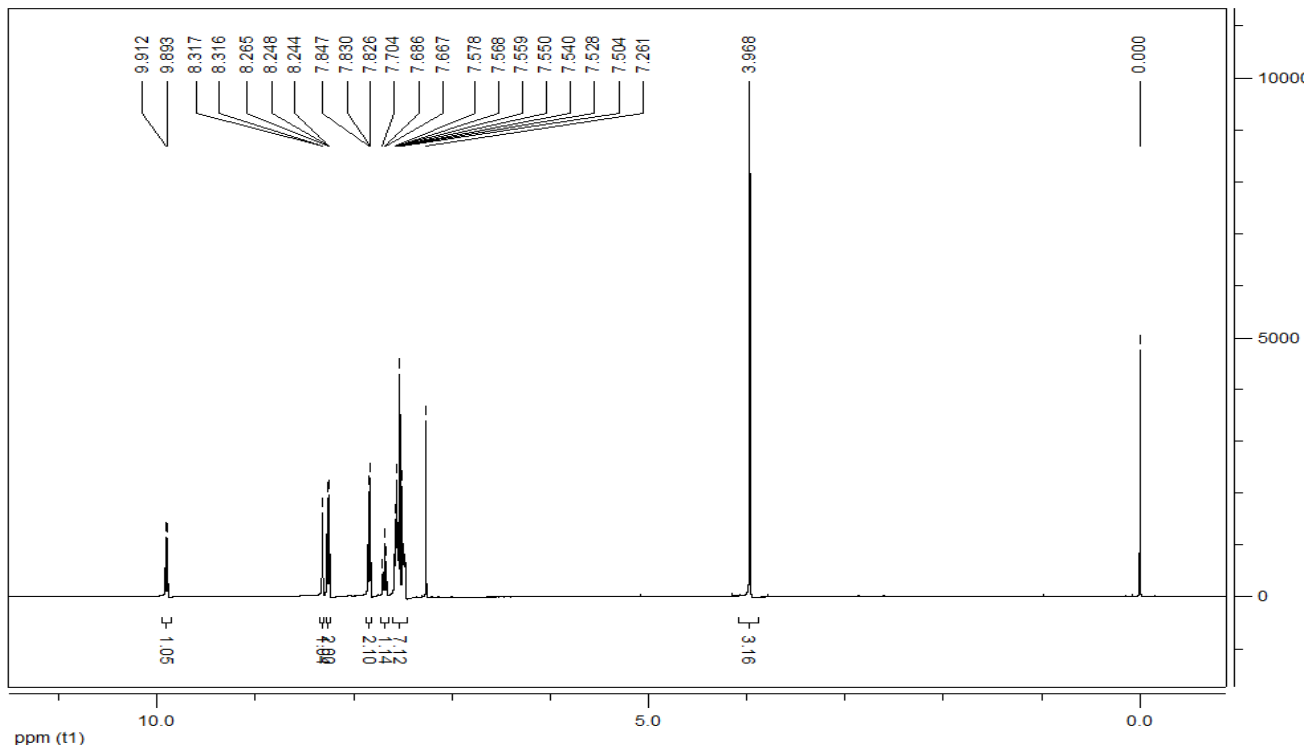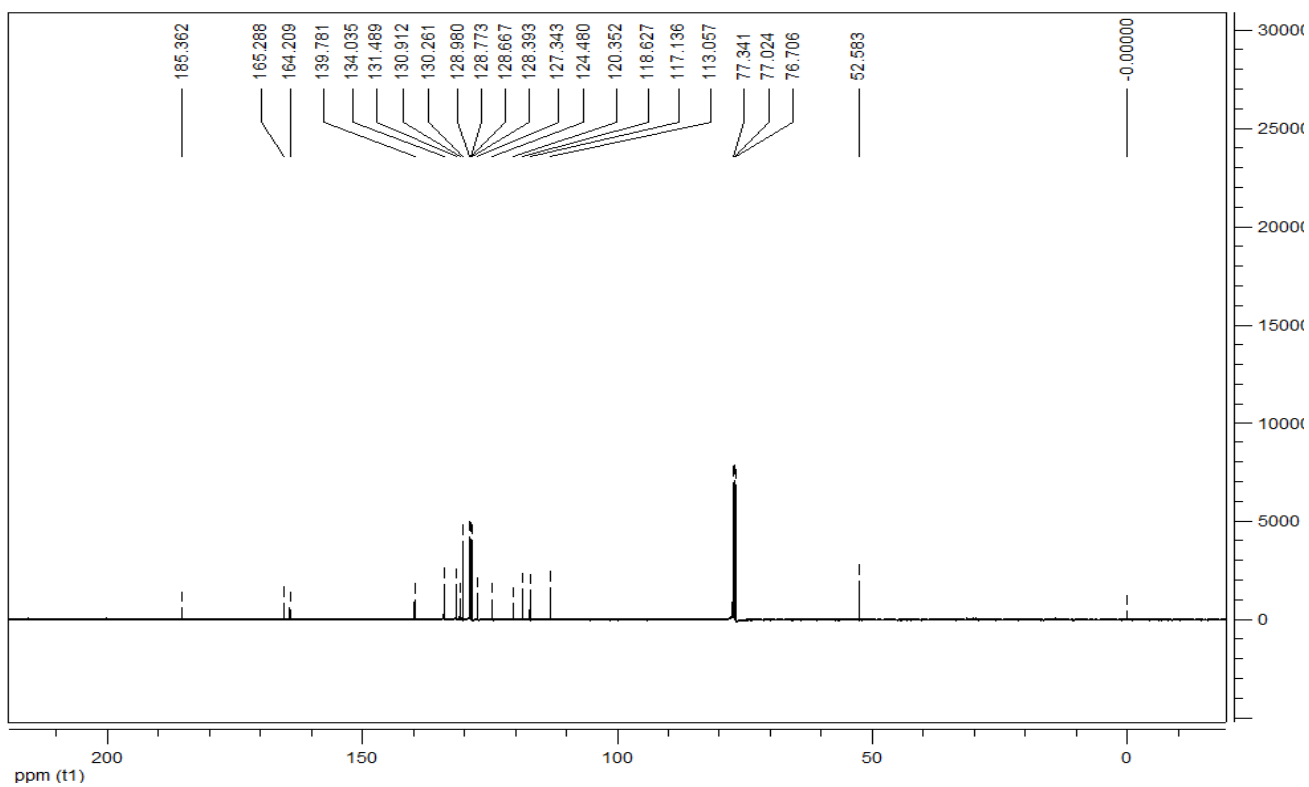

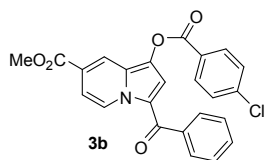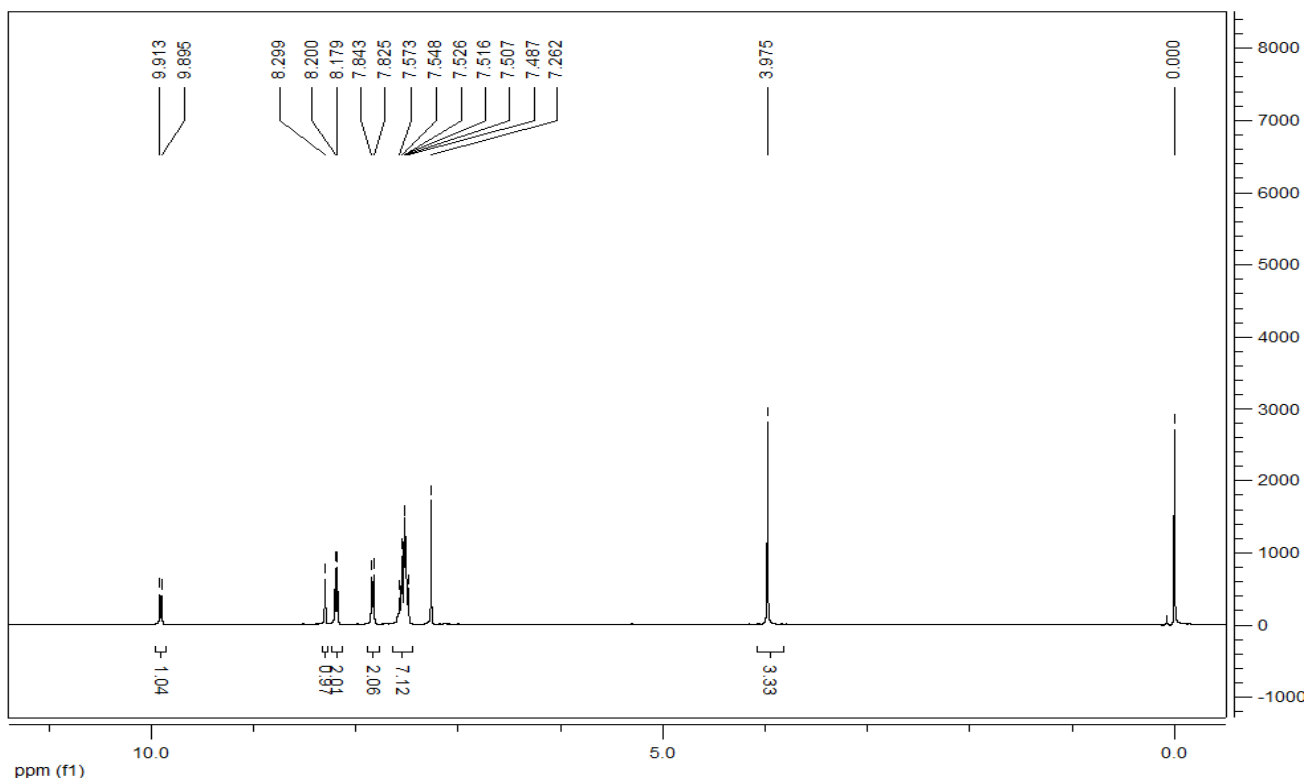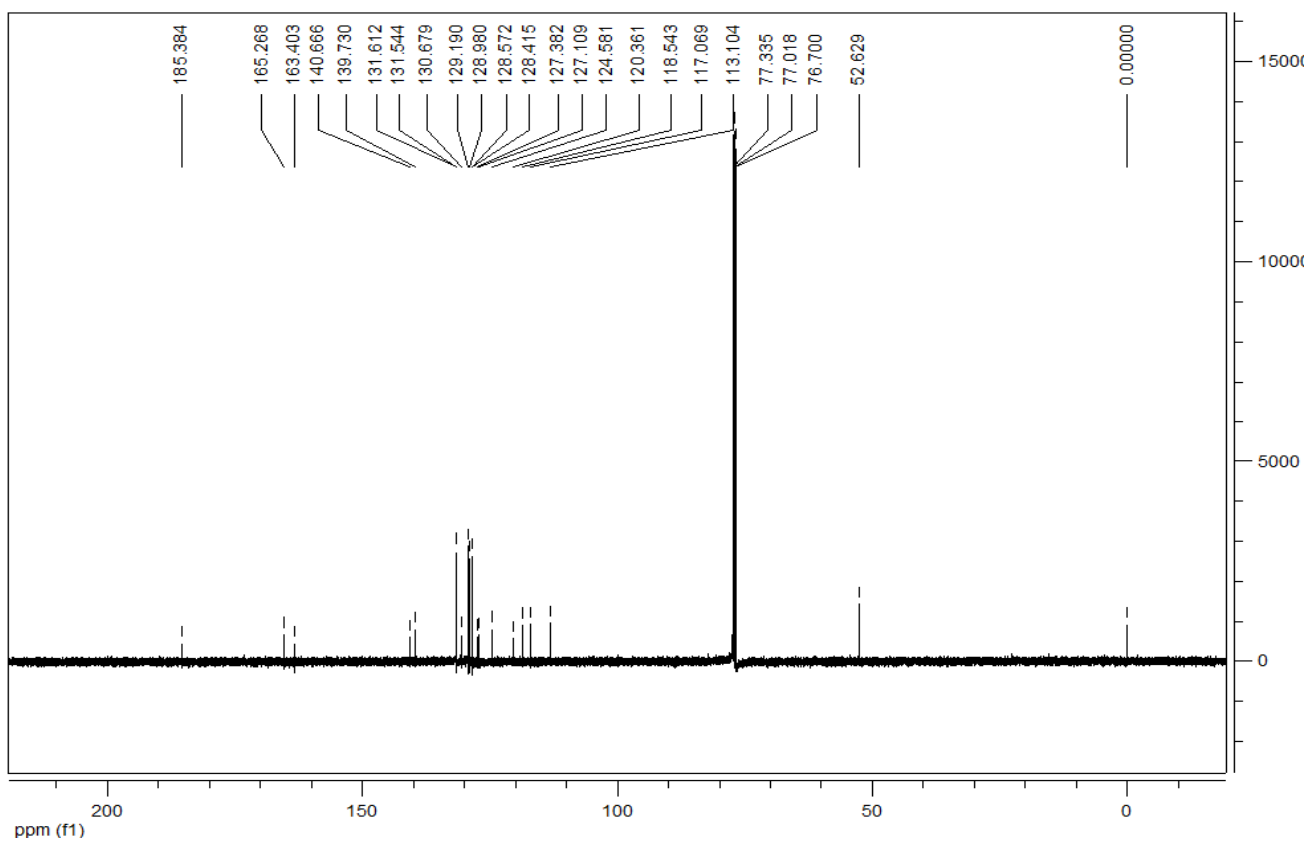

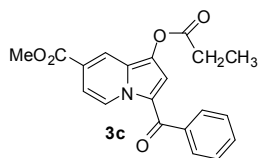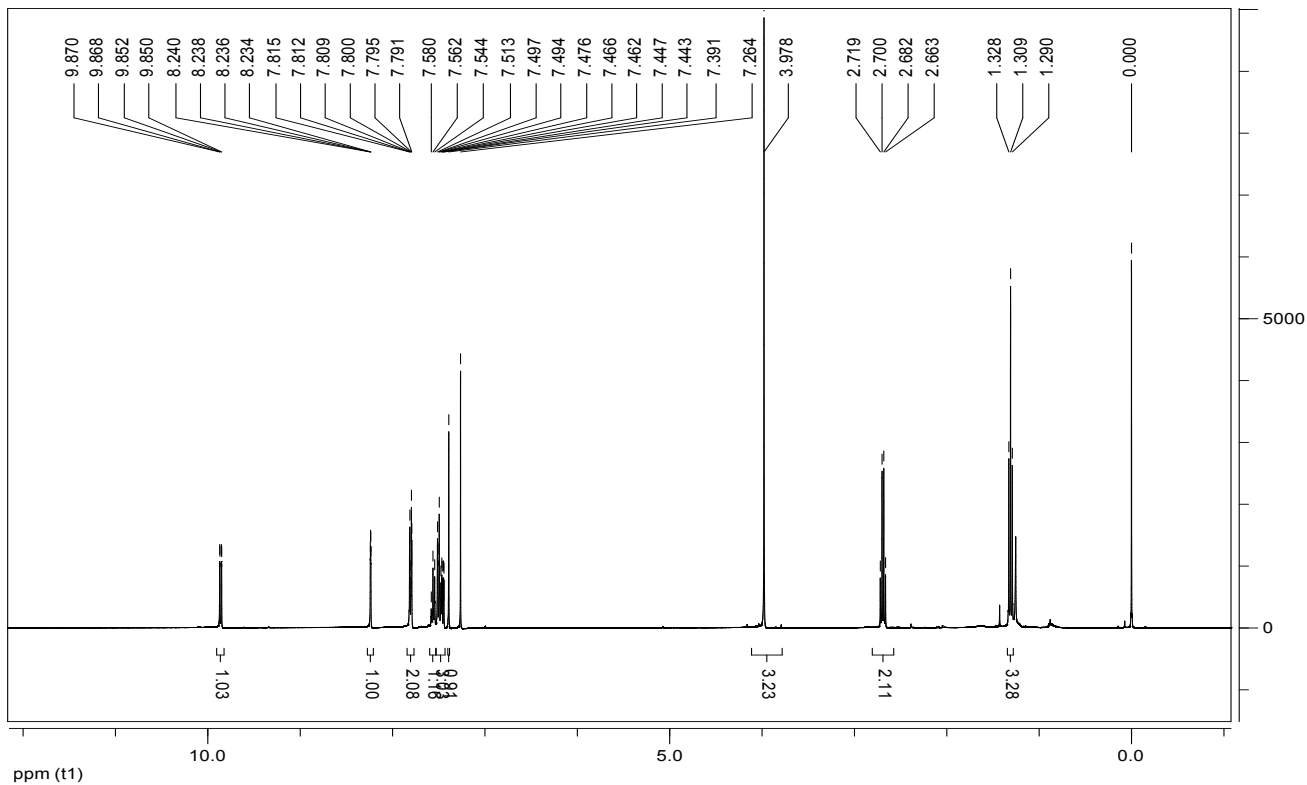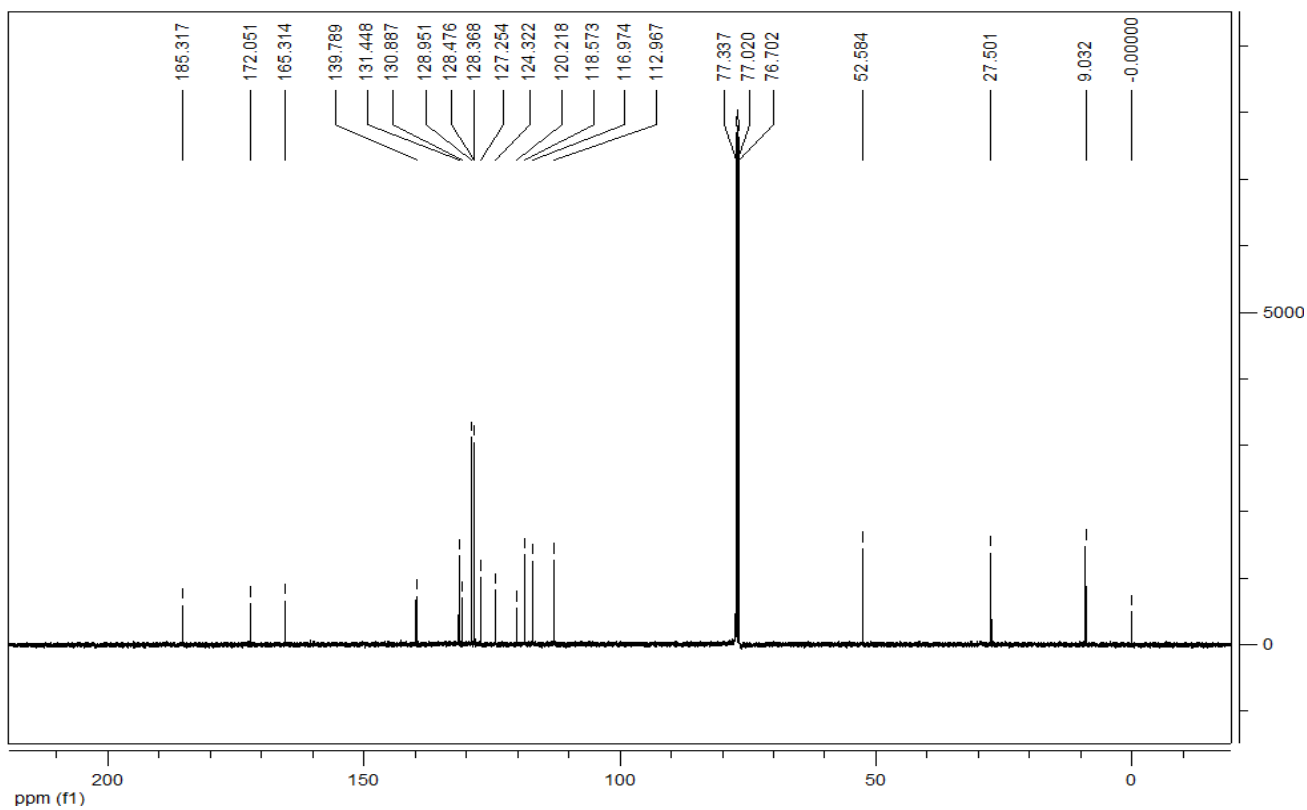



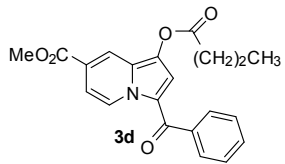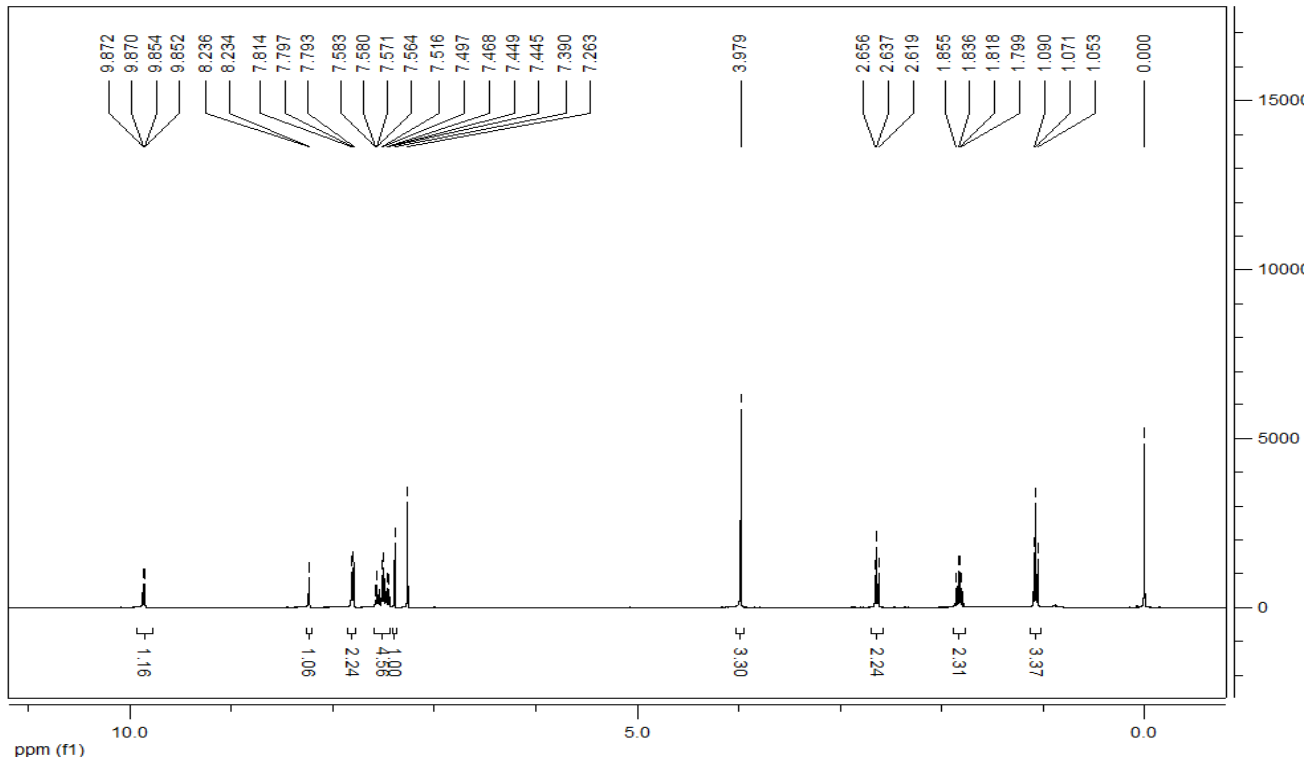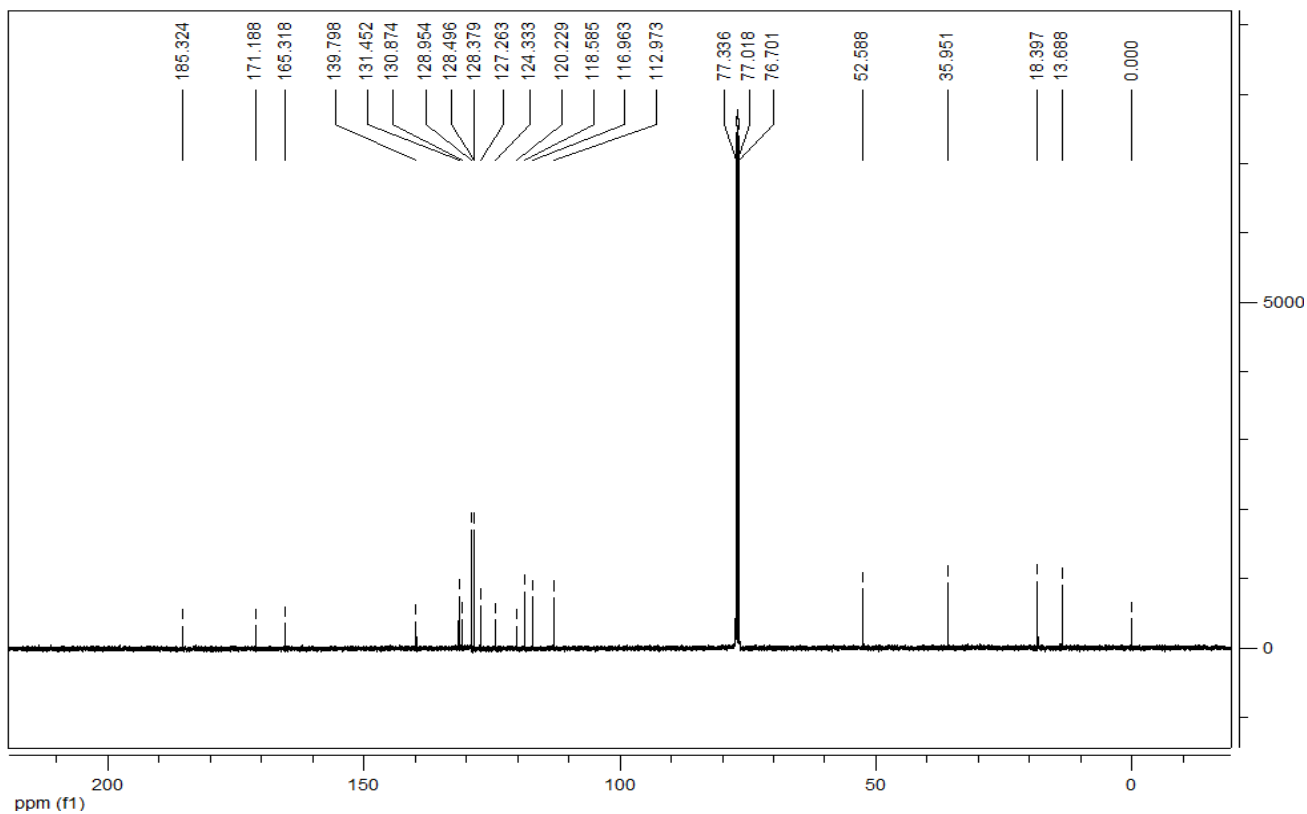

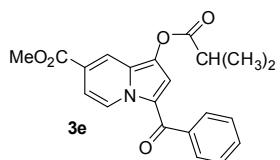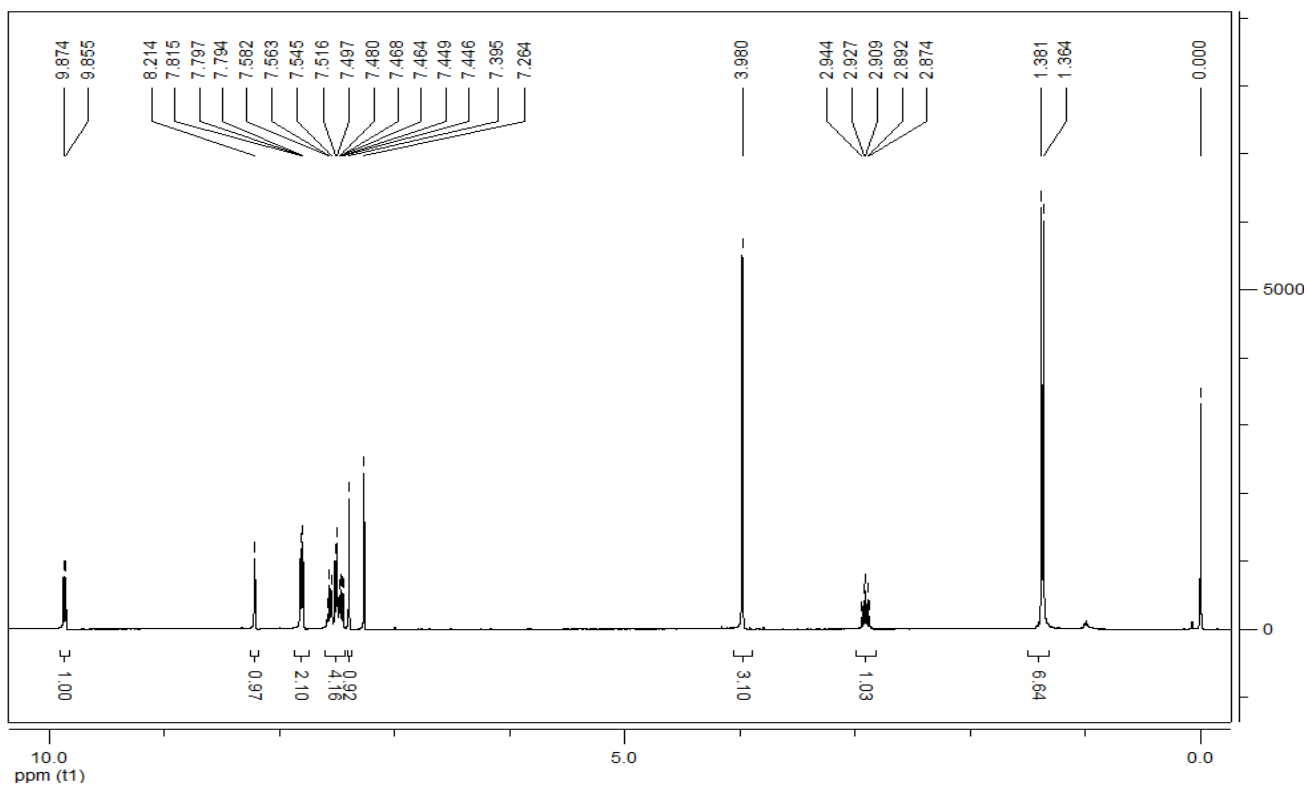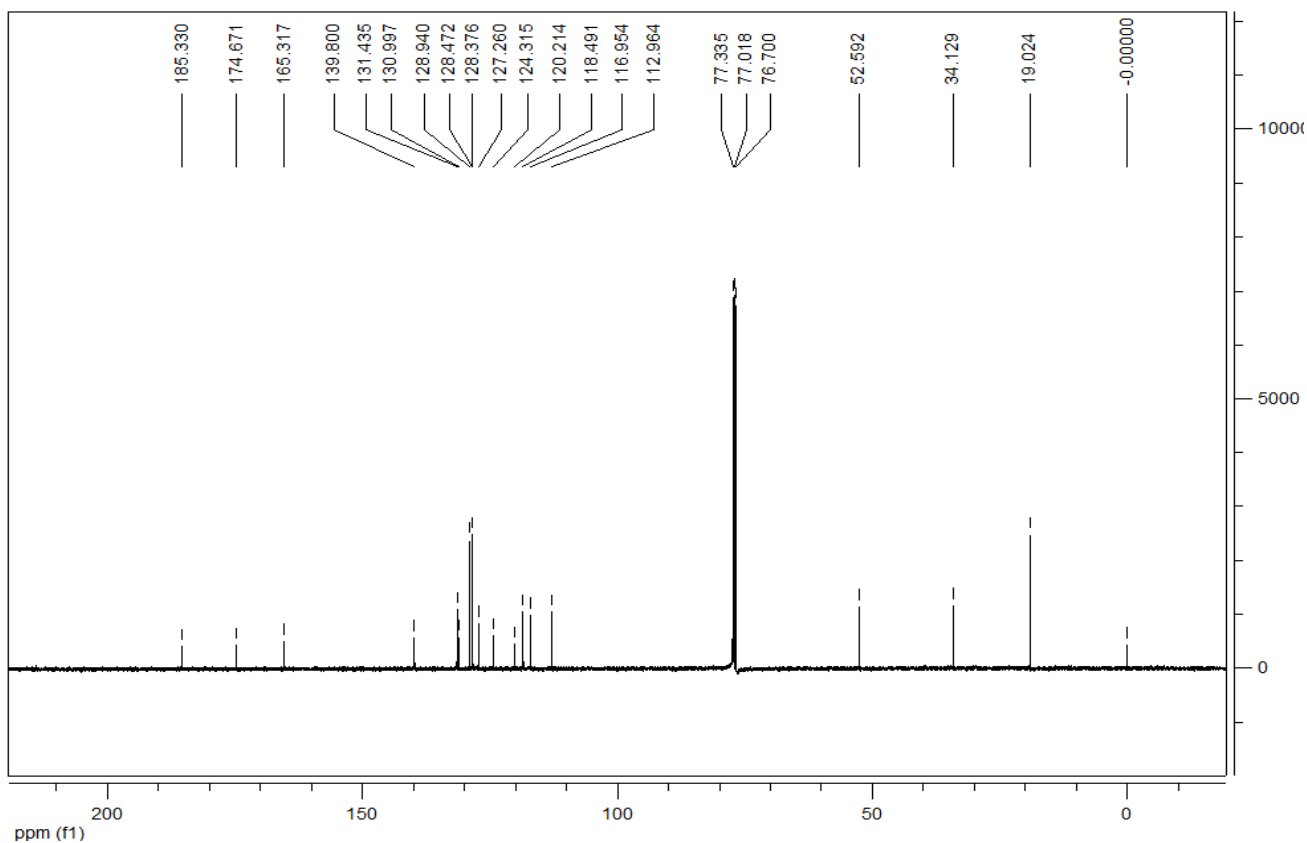

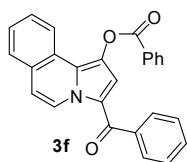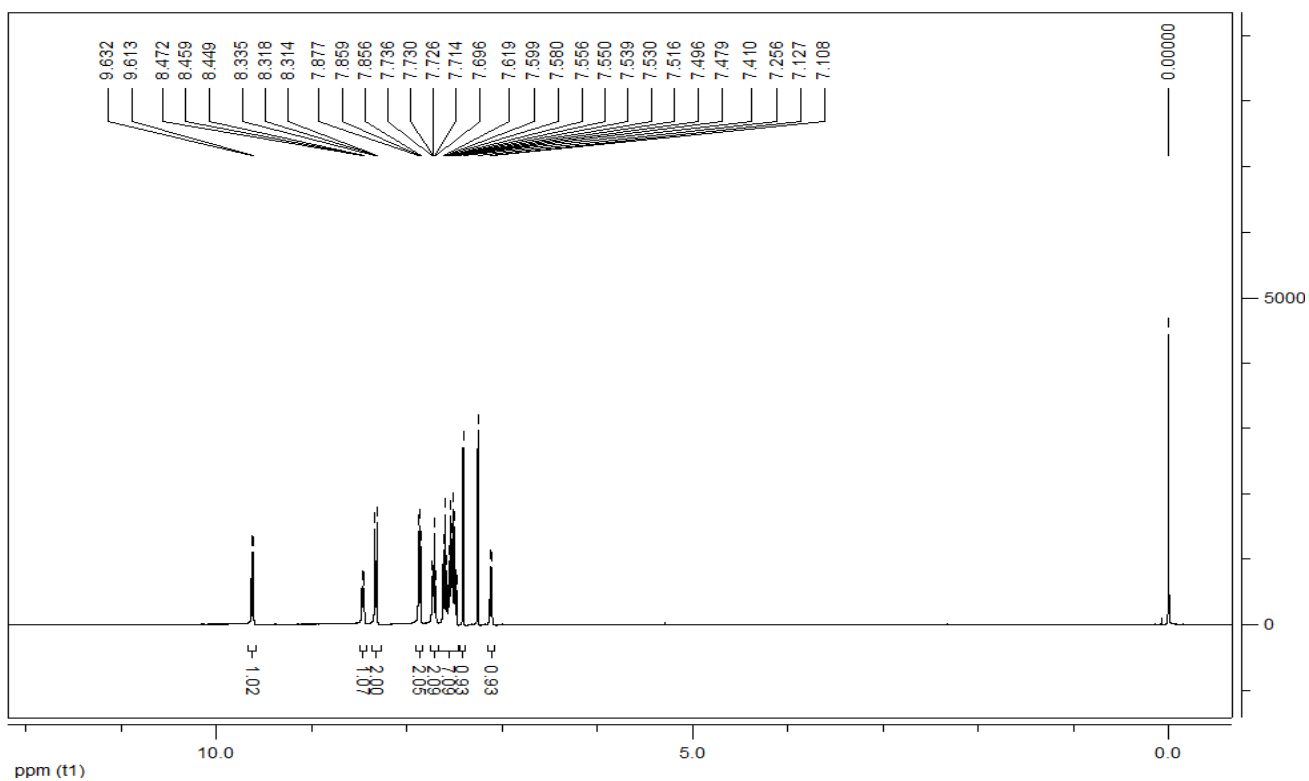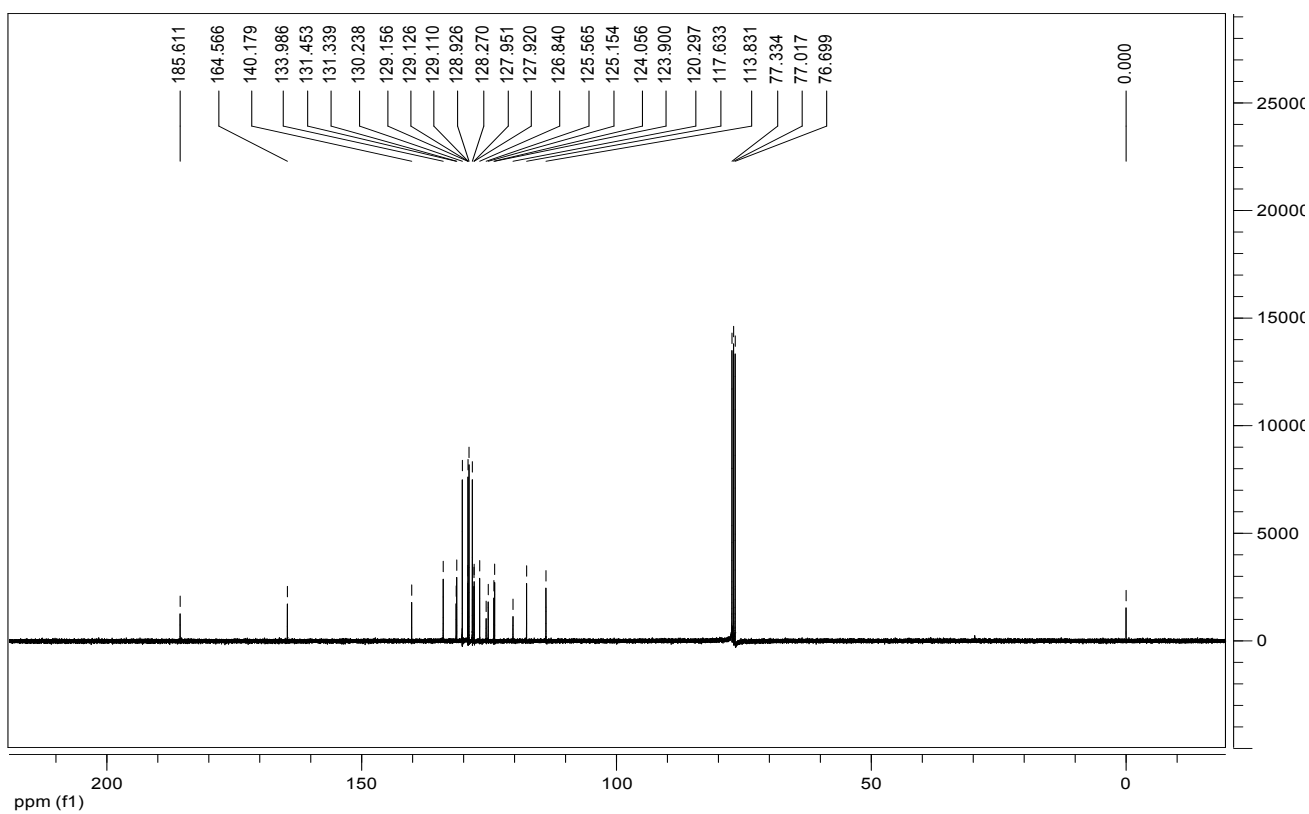

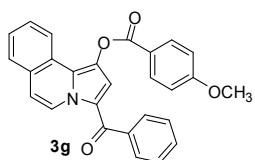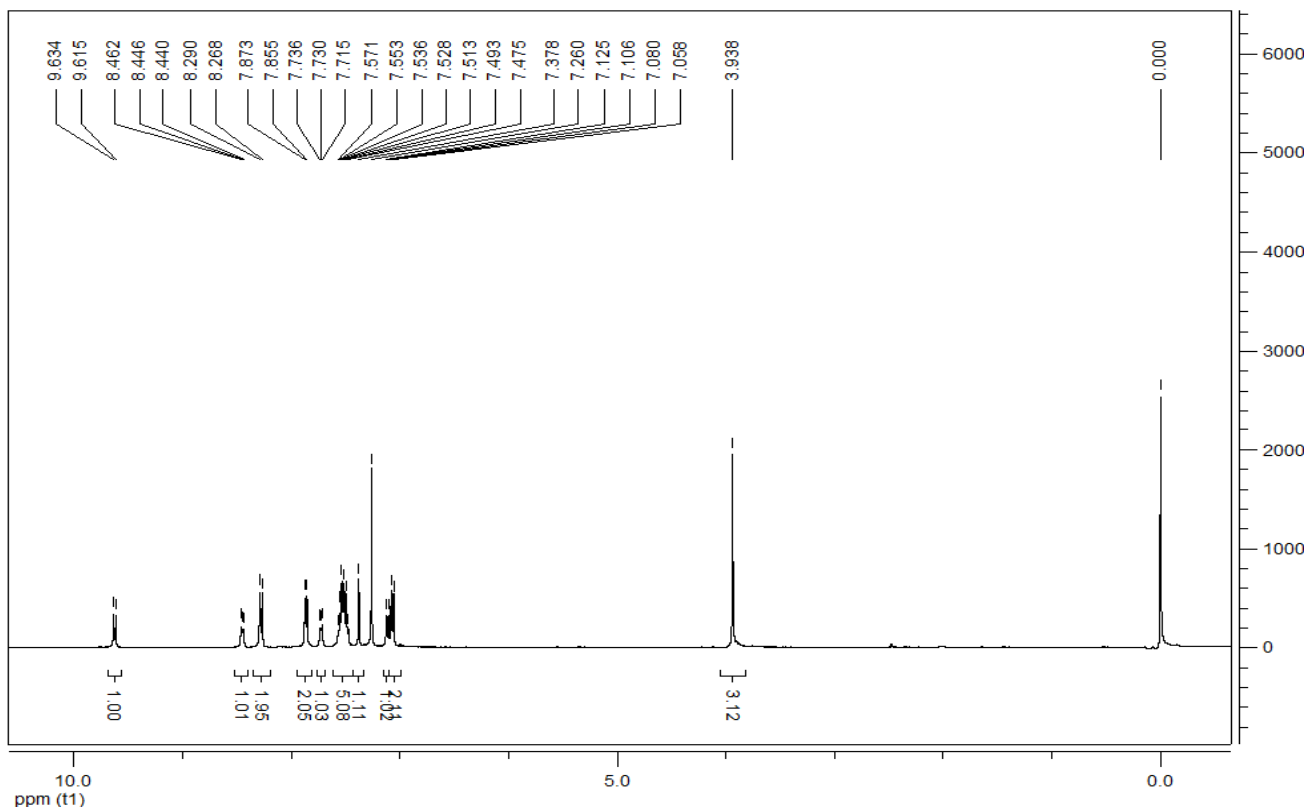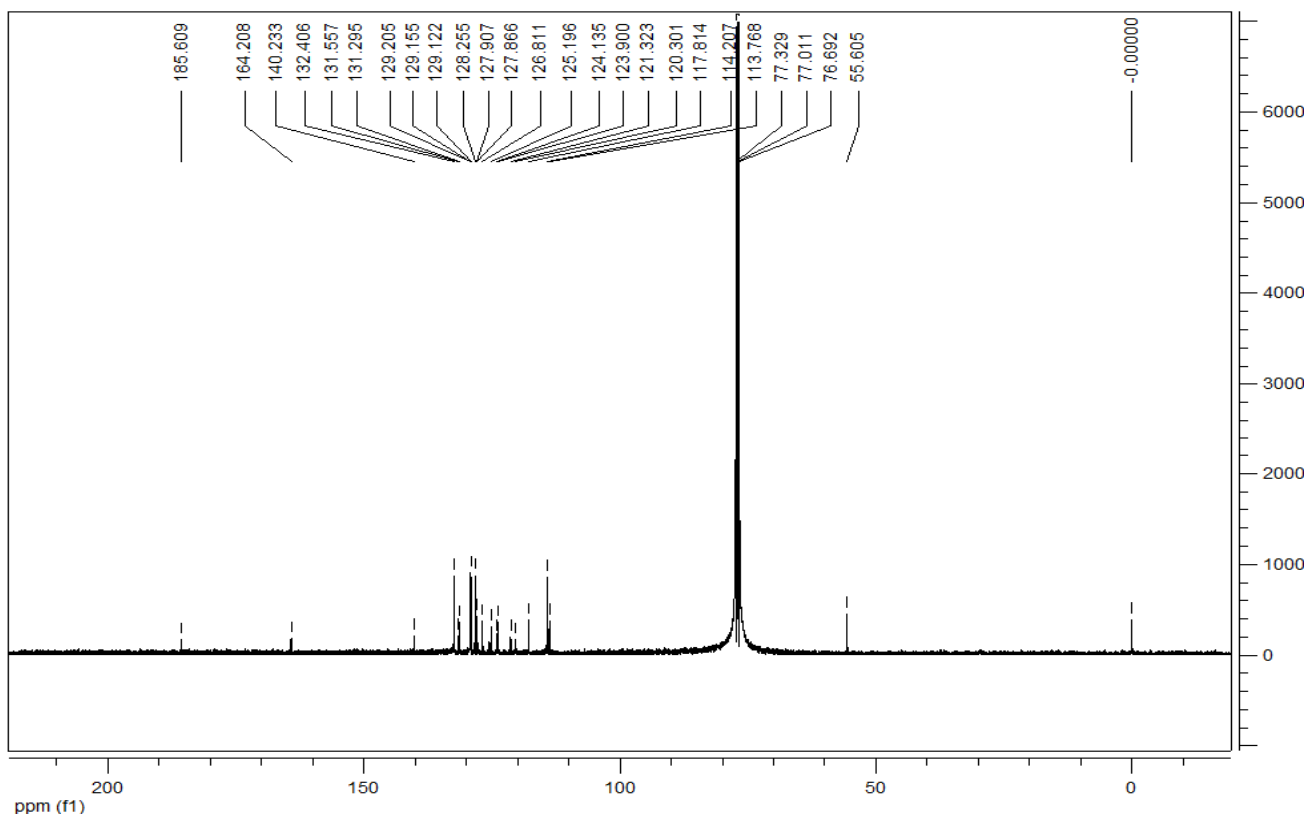

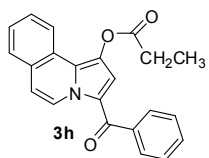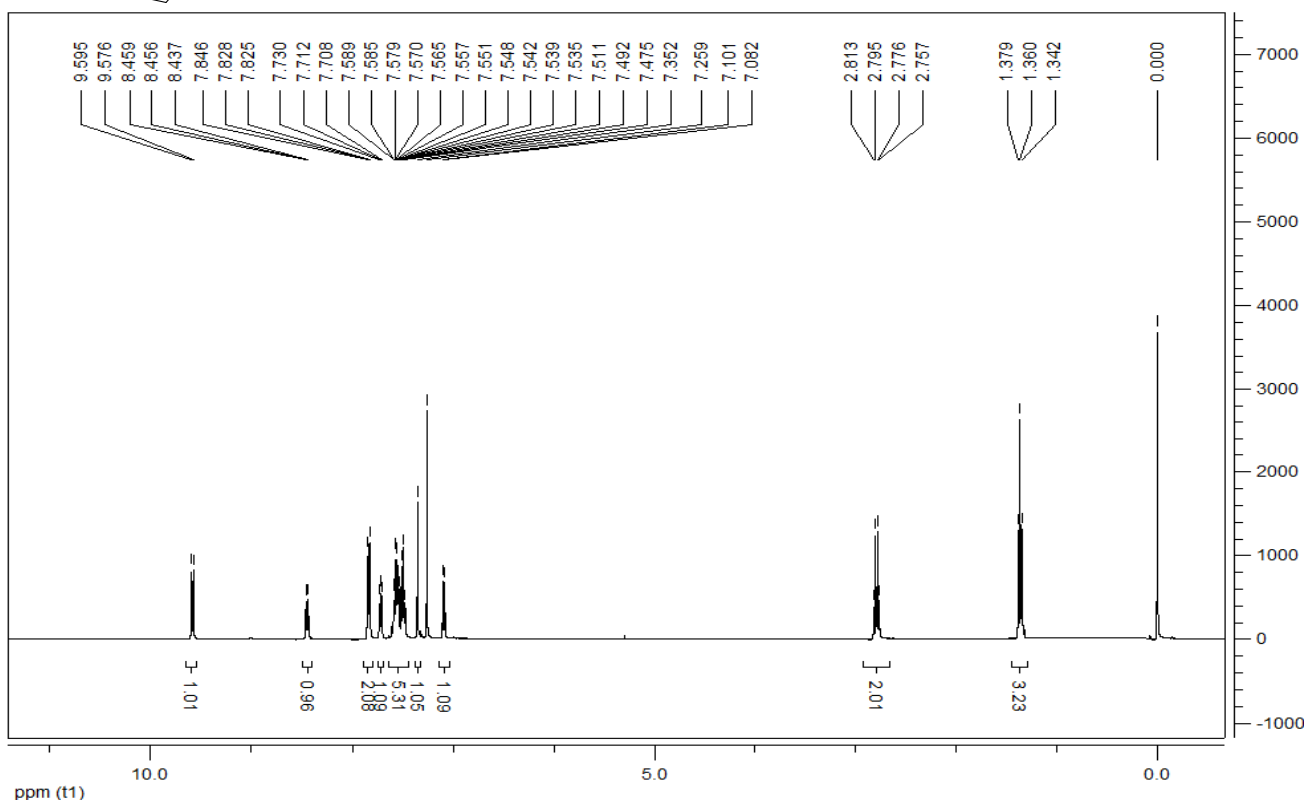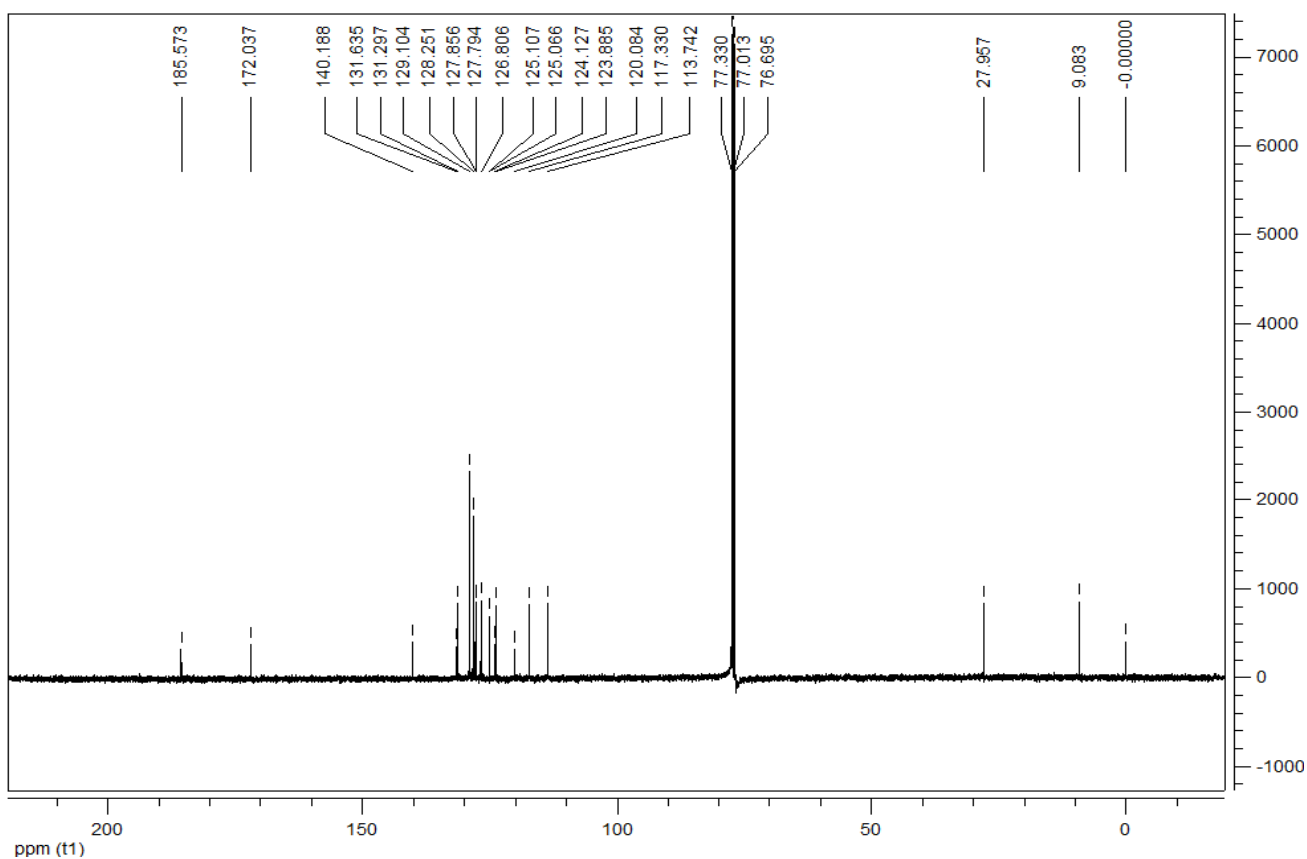

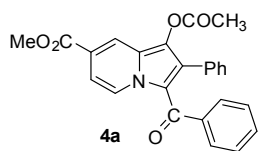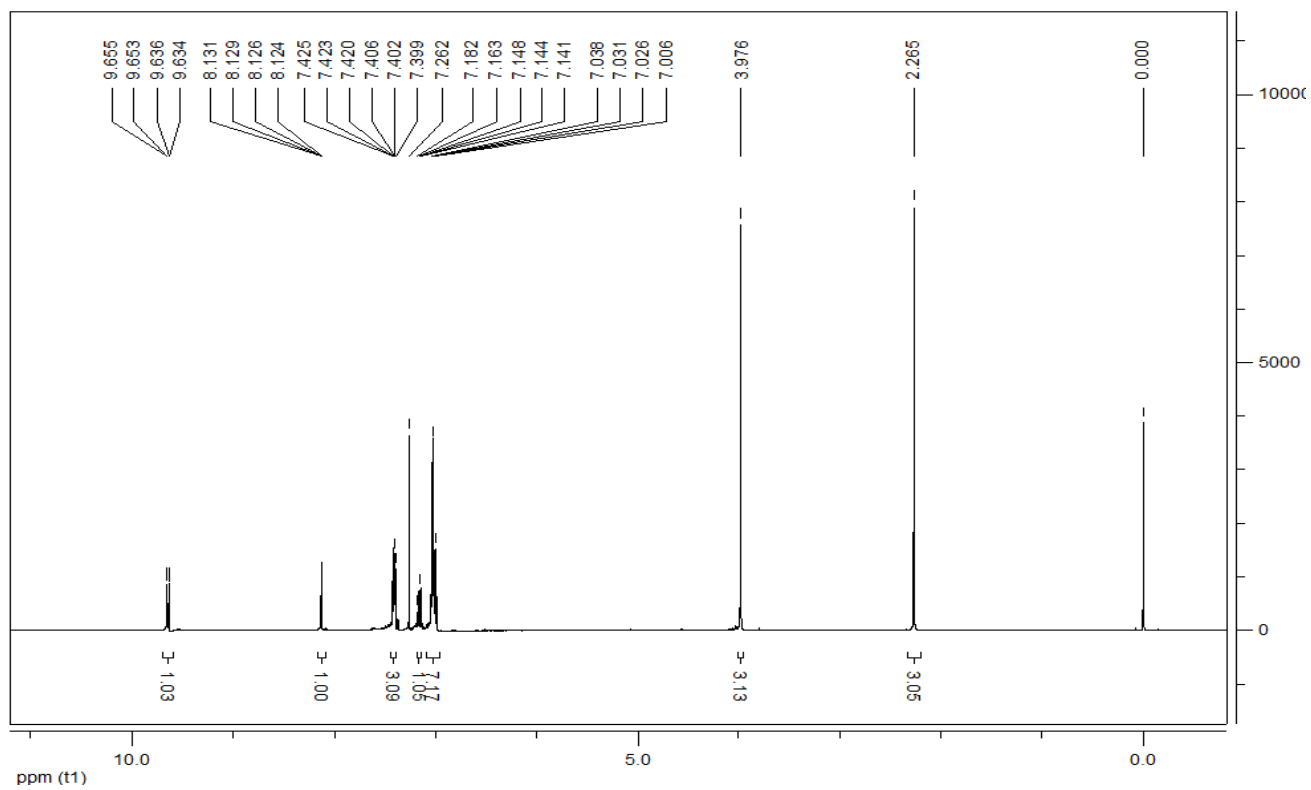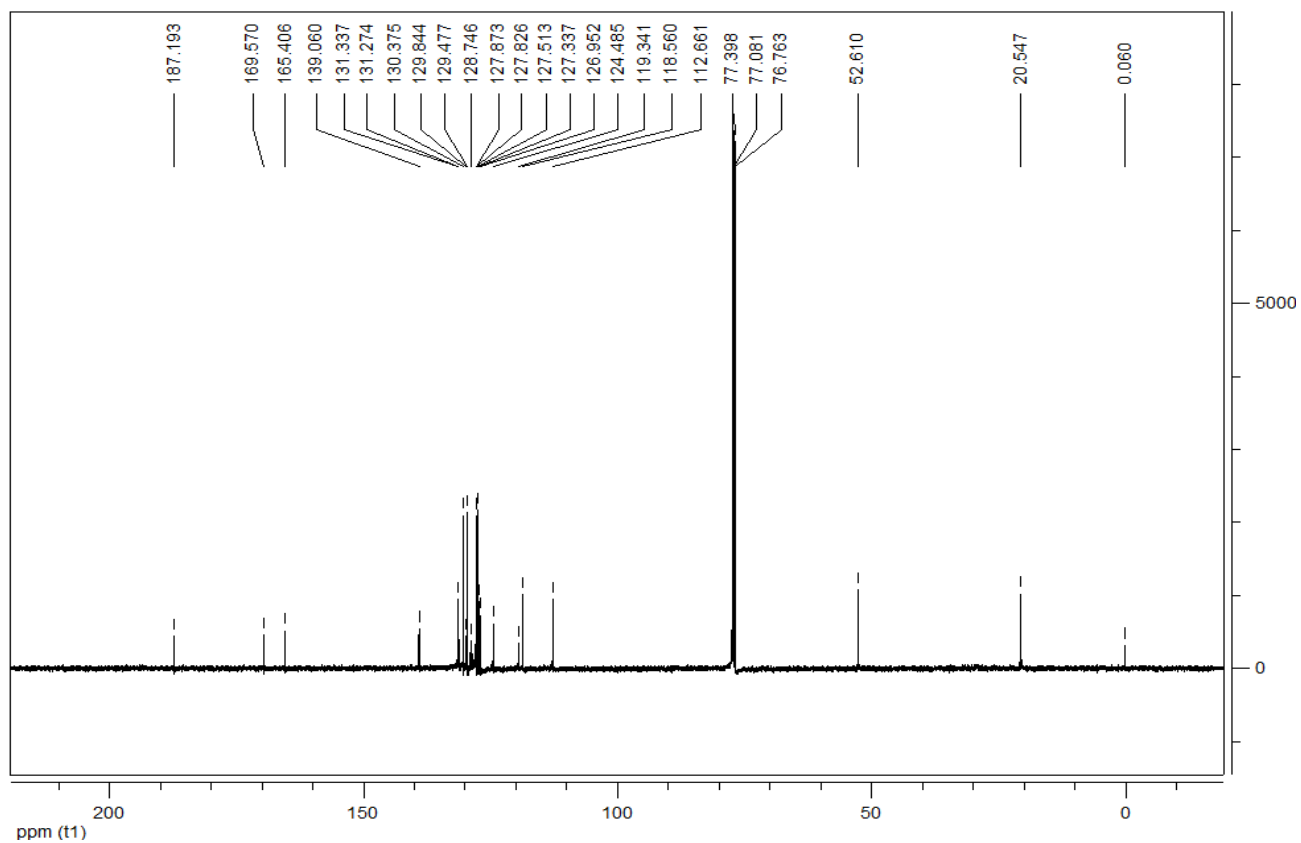

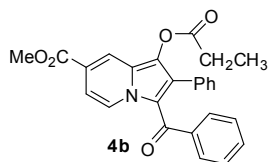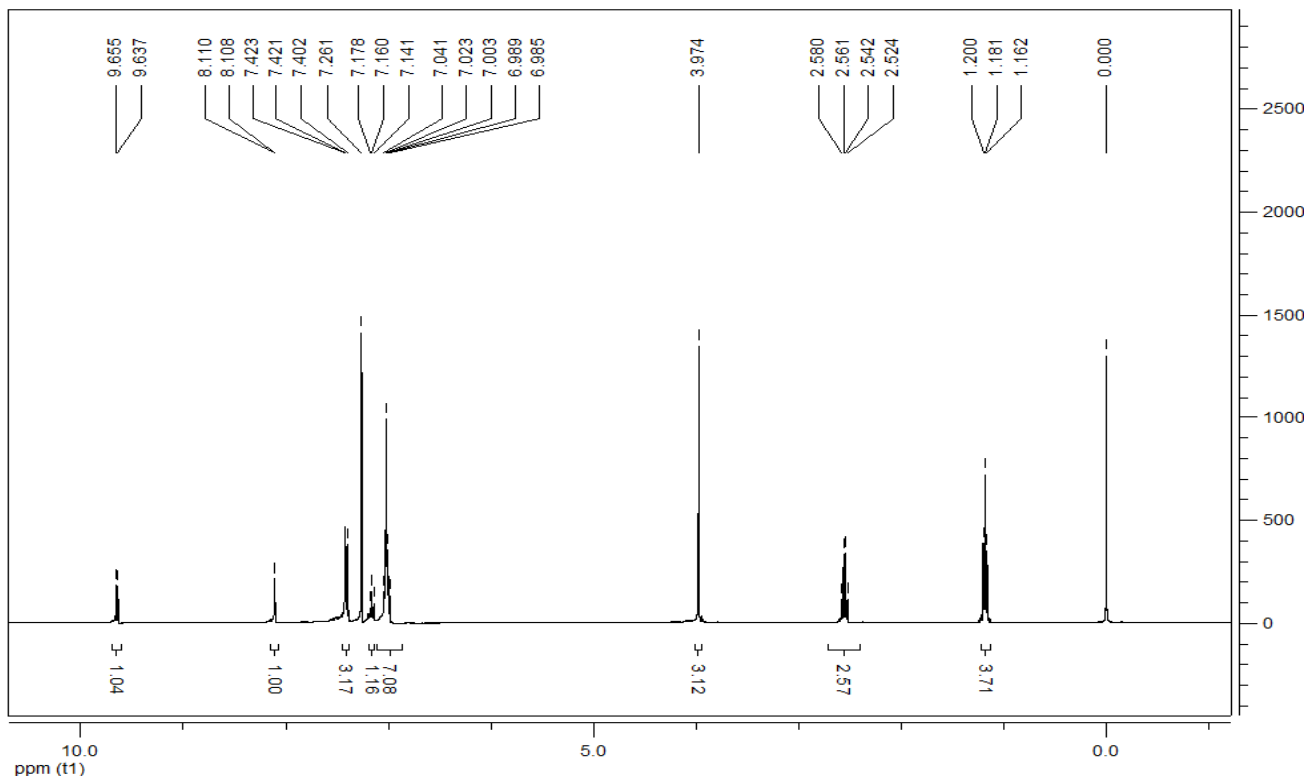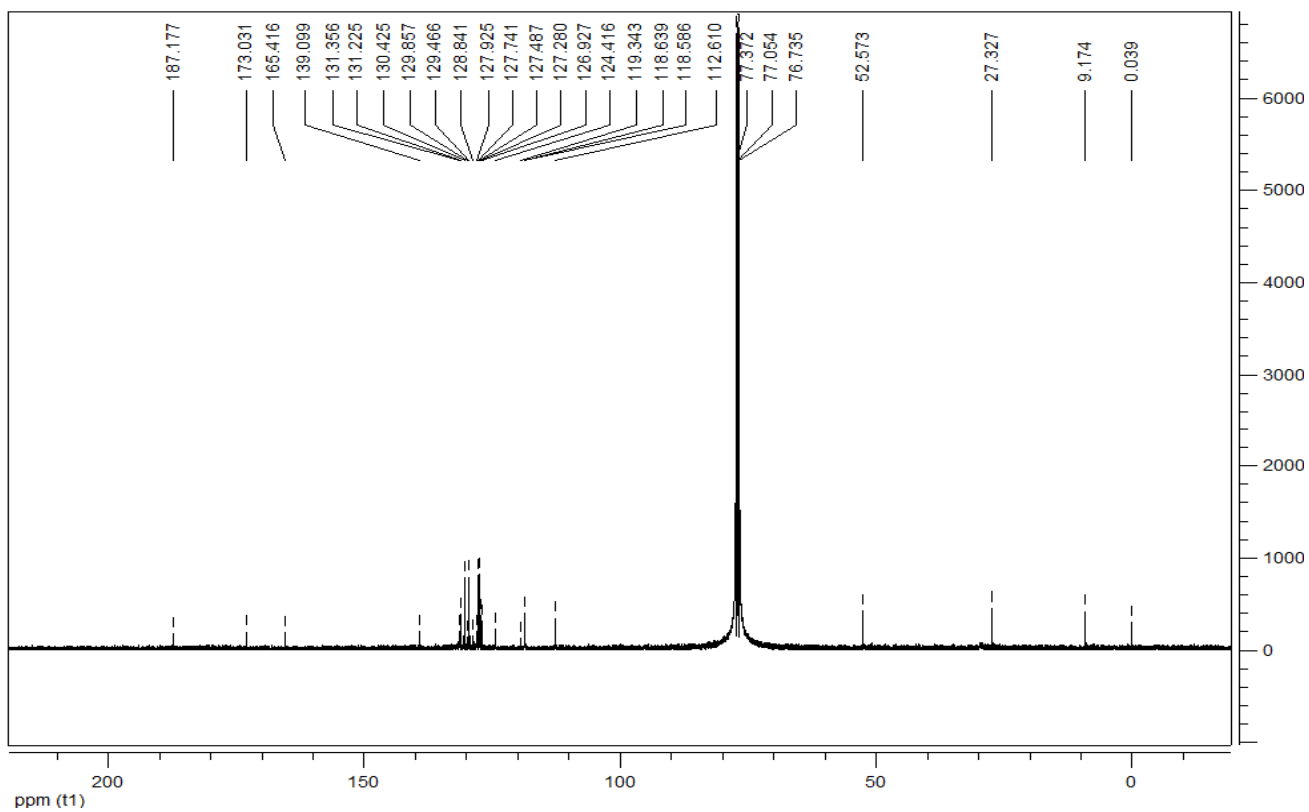

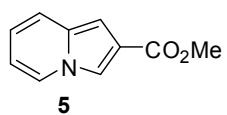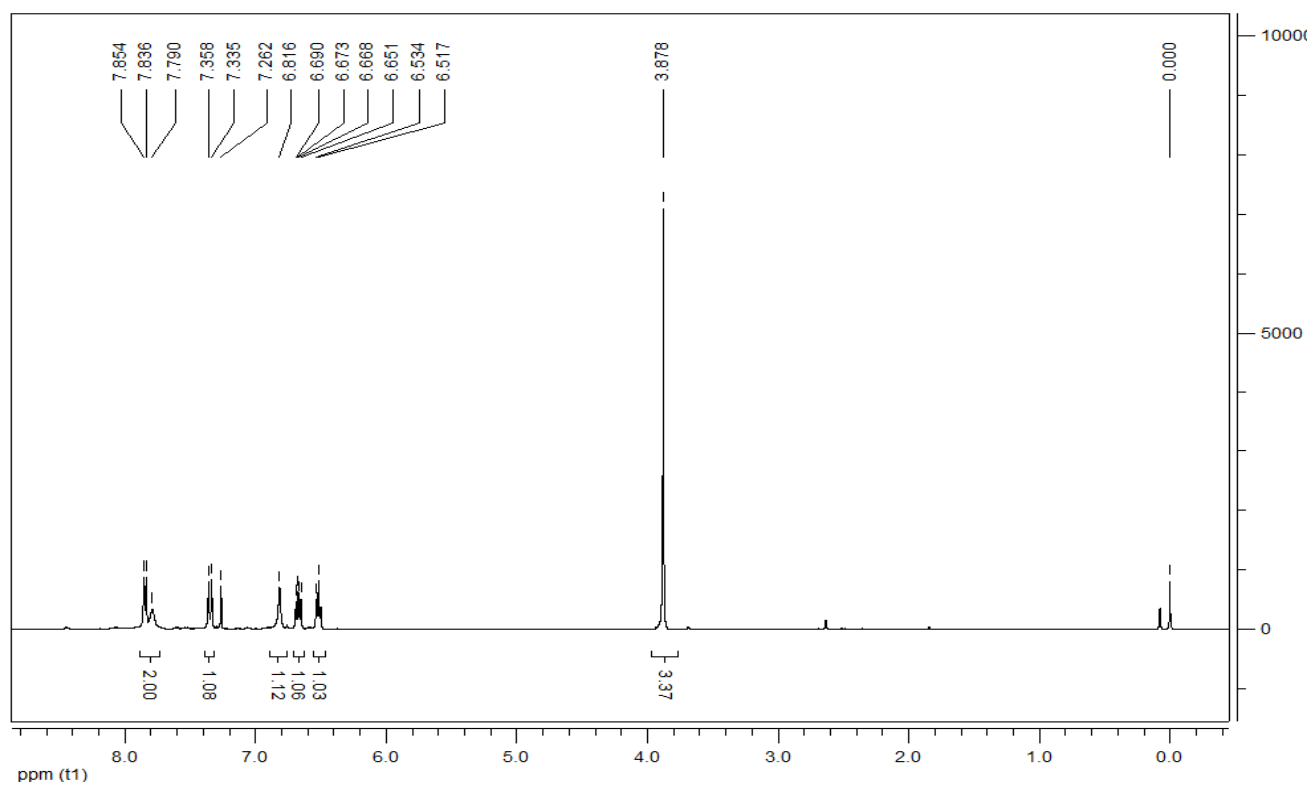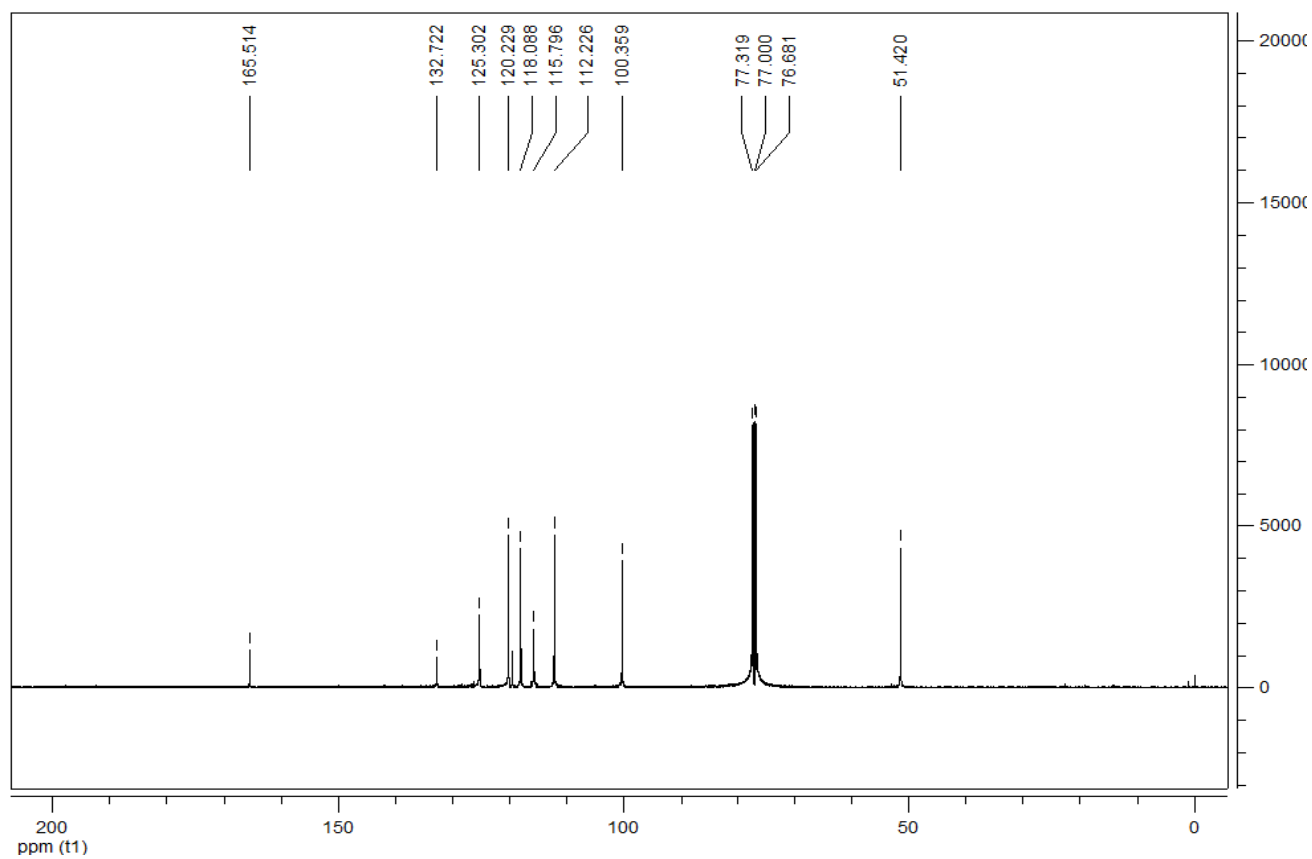



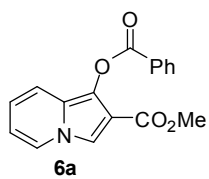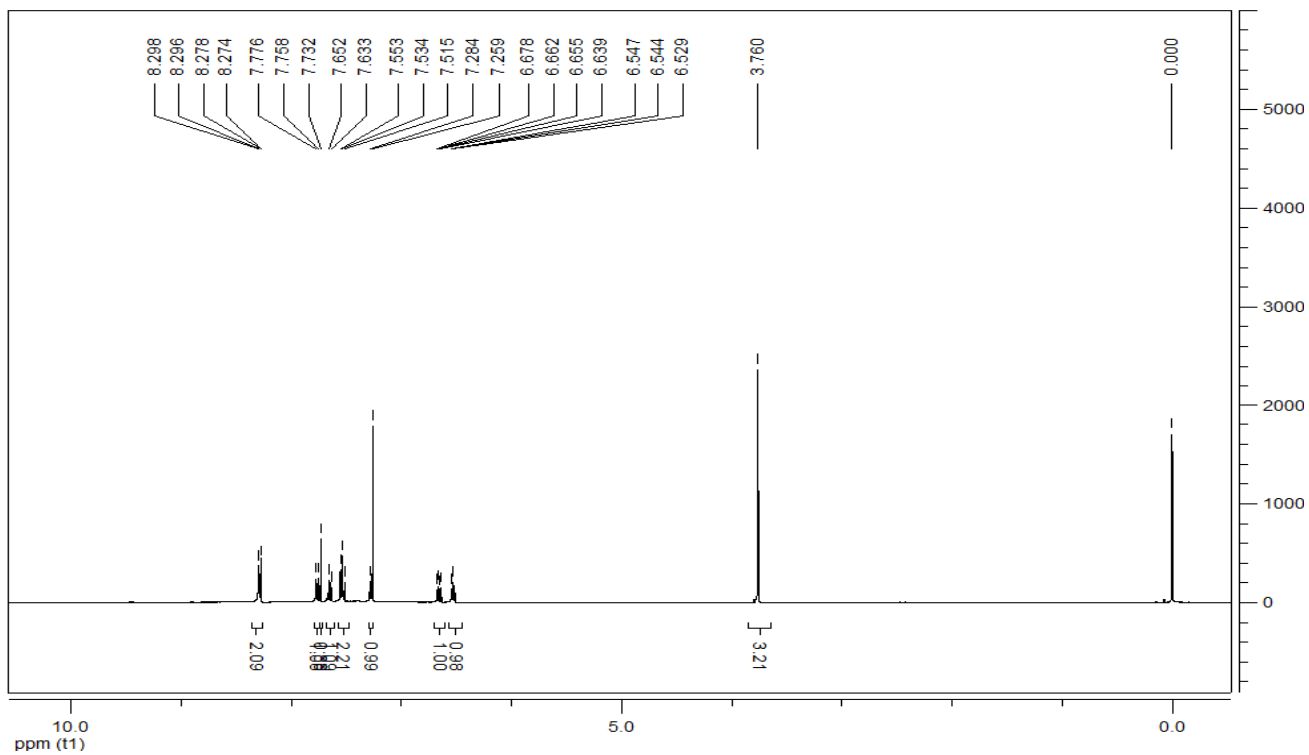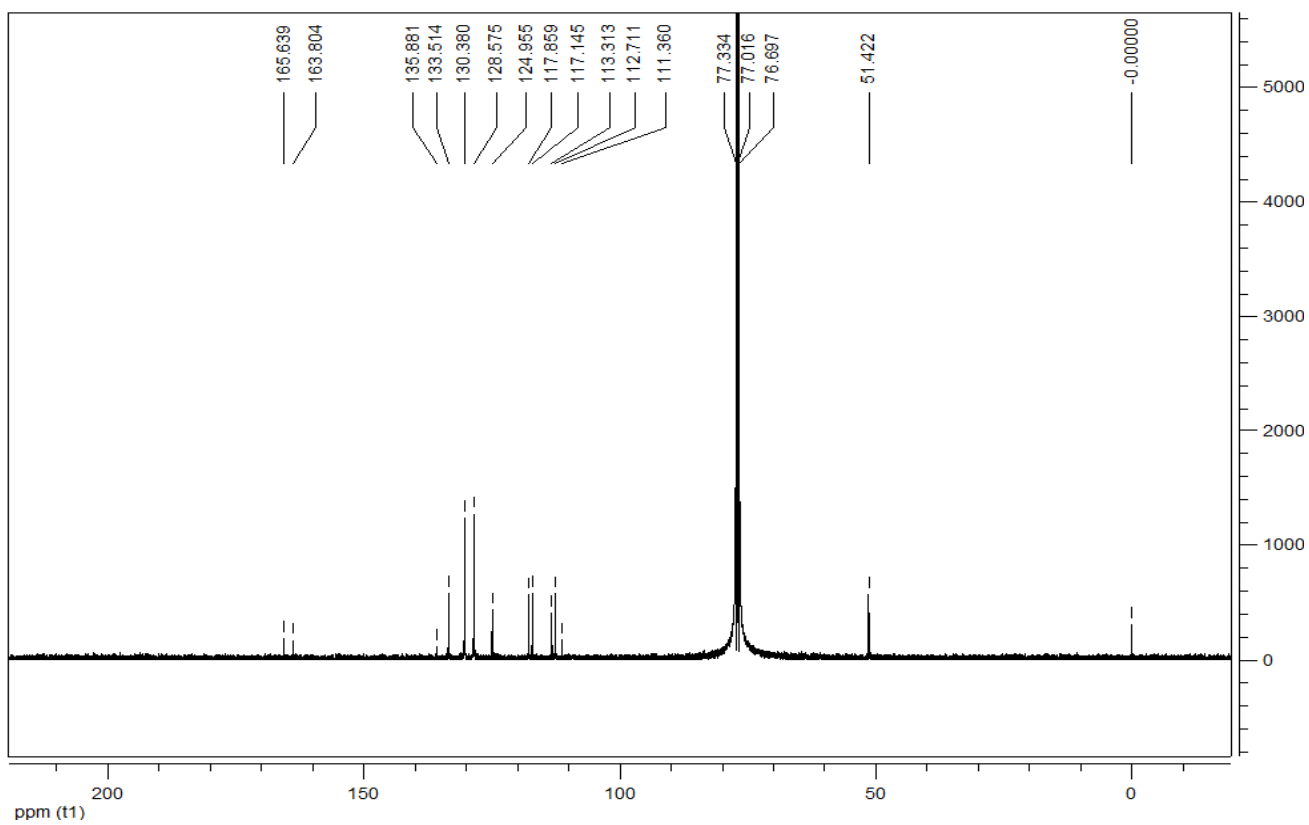

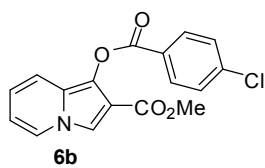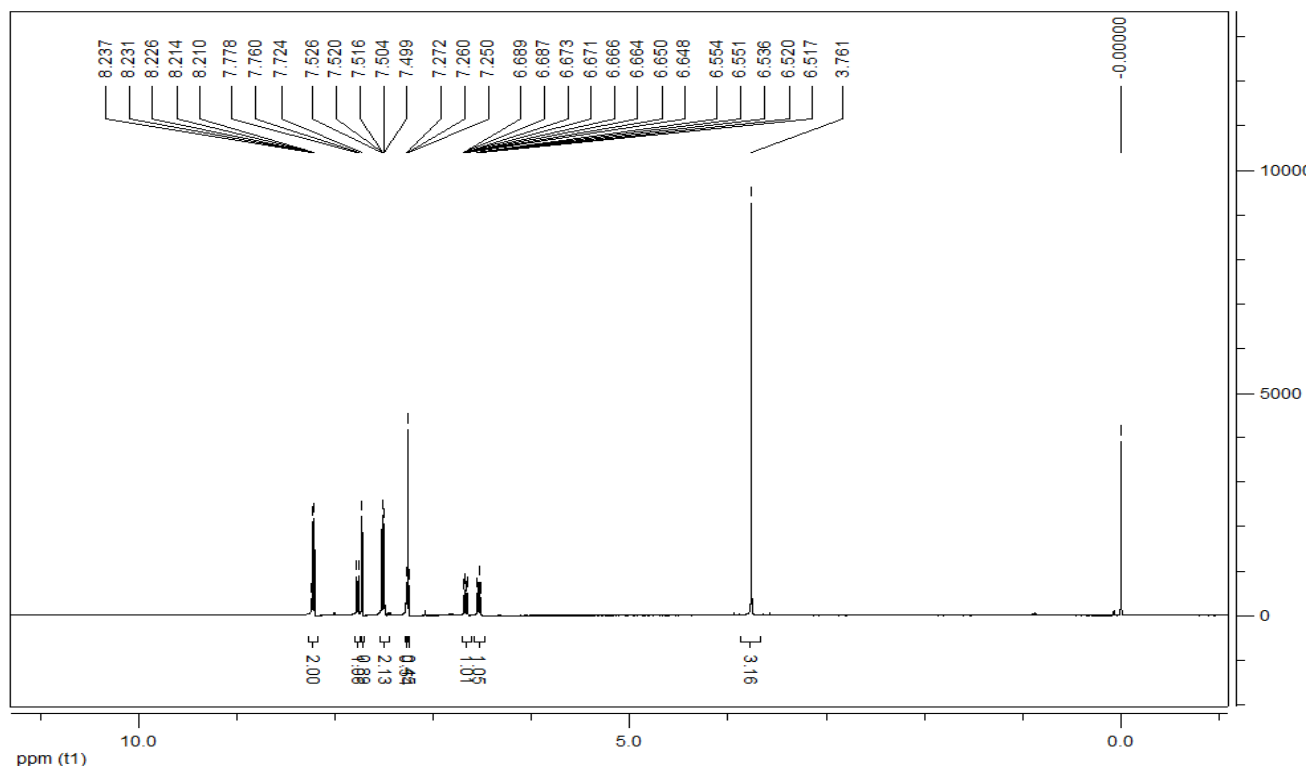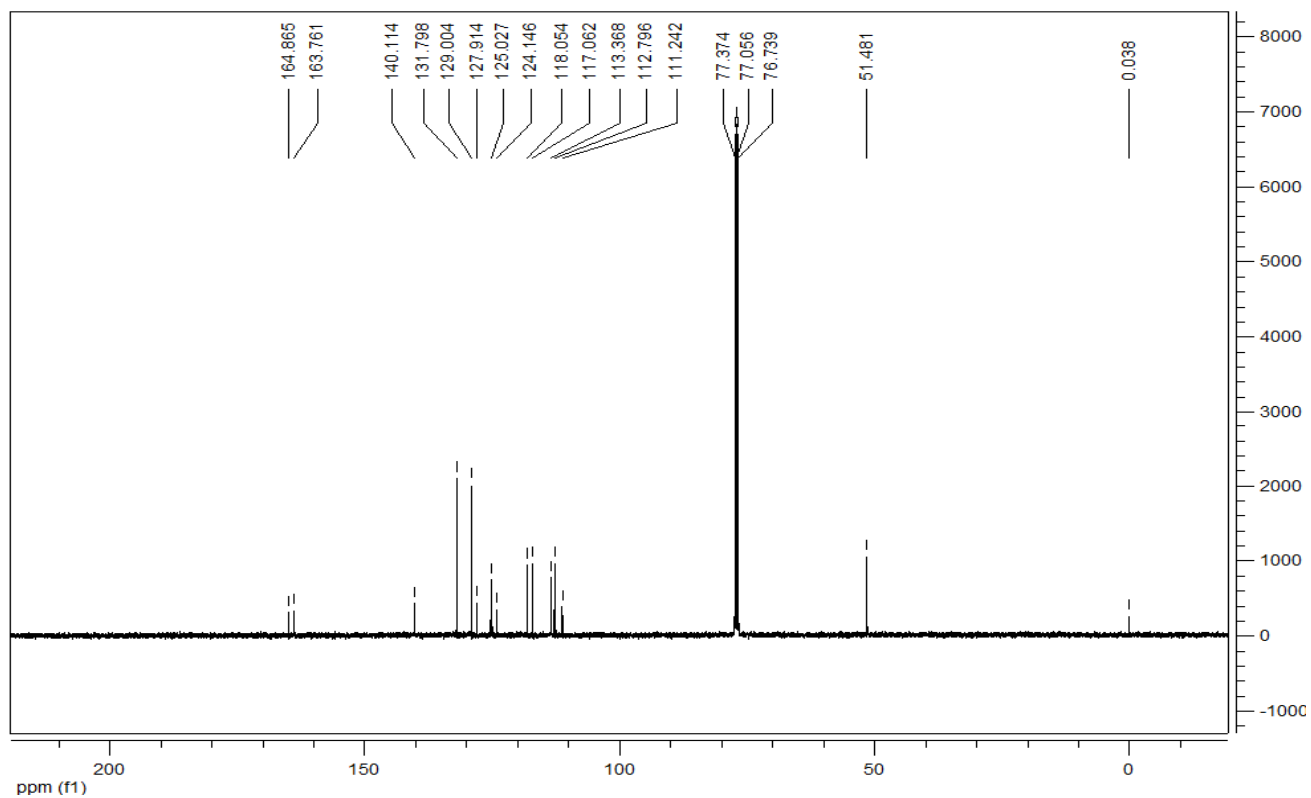

### B3LYP/6-31+G(d,p) Optimized Geometries and Atomic charges in 3-methoxycarbonylindolizine

Method: DFT, functional B3LYP, basis set 6-311+G(d,p), gas phase

Mulliken atomic charges at carbon atoms:

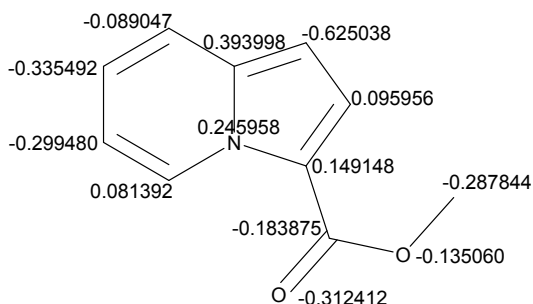

Mulliken charges with hydrogens summed into their linked carbon atoms:

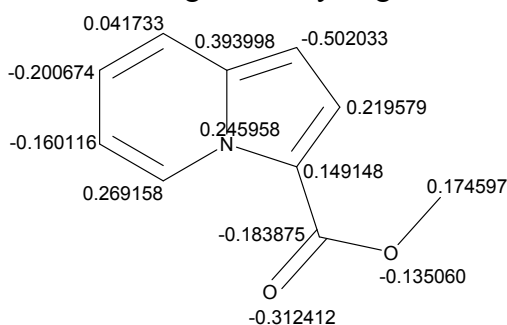

### B3LYP/6-31+G(d,p) Optimized Geometries and Atomic charges in Methyl indolizine-2-carboxylate

Method: DFT, functional B3LYP, basis set 6-311+G(d,p), gas phase

Mulliken atomic charges at carbon atoms:

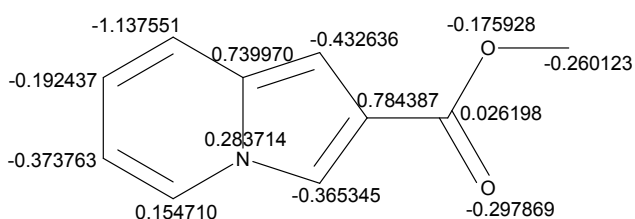

Mulliken charges with hydrogens summed into their linked carbon atoms:

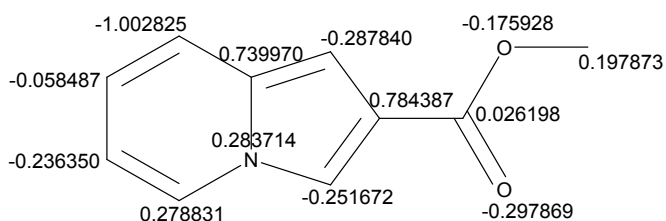

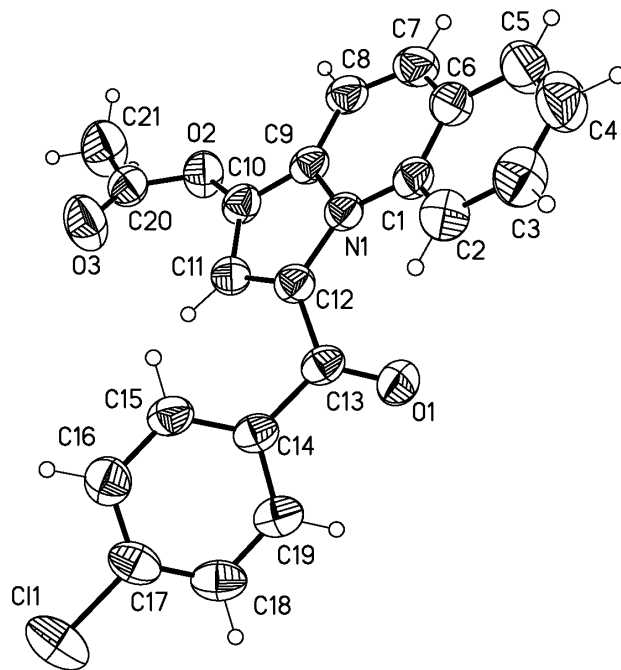

**ORTEP drawing of 2t (CCDC 1049376)**
